# 1            **Dynamic bimodality of curli expression in planktonic cultures of** 2            ***Escherichia coli* is stabilized by cyclic-di-GMP regulation**

3  
4        Olga Lamprecht<sup>1†</sup>, Maryia Ratnikava<sup>1</sup>, Paulina Jacek<sup>1</sup>, Eugen Kaganovitch<sup>1</sup>, Nina Buettner<sup>1</sup>,  
5            Kirstin Fritz<sup>1</sup>, Robin Köhler<sup>1</sup>, Julian Pietsch<sup>1</sup>, and Victor Sourjik<sup>1\*</sup>

6  
7        <sup>1</sup>Max Planck Institute for Terrestrial Microbiology and Center for Synthetic Microbiology  
8        (SYNMIKRO), Karl-von-Frisch Strasse 16, 35043 Marburg, Germany

9        <sup>†</sup>Present address: Eawag: Swiss Federal Institute of Aquatic Science and Technology,  
10        Dübendorf, Switzerland

11  
12  
13        \*Corresponding author: Victor Sourjik, [victor.sourjik@synmikro.mpi-marburg.mpg.de](mailto:victor.sourjik@synmikro.mpi-marburg.mpg.de)

## 14 15 16        **Abstract**

17        Curli amyloid fibers are major constituent of the extracellular biofilm matrix formed by bacteria  
18        of the Enterobacteriaceae family. Within *Escherichia coli* biofilms, curli gene expression is  
19        limited to a subpopulation of bacteria, leading to heterogeneity of extracellular matrix synthesis.  
20        Here we show that bimodal activation of curli expression also occurs in well-mixed planktonic  
21        cultures of *E. coli*, resulting in stochastic differentiation into distinct subpopulations of curli-  
22        positive and curli-negative cells at the entry into the stationary phase of growth. Monitoring  
23        curli activation in individual *E. coli* cells growing in a microfluidic device revealed that the curli-  
24        positive state is only metastable and it can spontaneously revert during continuous growth in  
25        a conditioned medium. The regulation by c-di-GMP is not required for curli gene activation or  
26        for differentiation of *E. coli* in subpopulations of curli-producing and curli-negative cells.  
27        Instead, we observe that c-di-GMP modulates the probability and dynamics of stochastic curli  
28        activation and enhances stability of the curli-positive state.

29  
30        **Keywords:** Gene expression, bacteria, biofilm, bistability, differentiation, amyloid fibers

## 31 Introduction

32 Curli amyloid fibers are the key component of the extracellular matrix produced during biofilm  
33 formation by *Escherichia coli*, *Salmonella enterica*, and other Enterobacteriaceae [1-9]. In *E.*  
34 *coli* and *S. enterica* serovar Typhimurium, curli genes are organized in two divergently  
35 transcribed *csgBAC* and *csgDEFG* operons that share a common intergenic regulatory region  
36 [10]. Expression of these operons is under regulation of the stationary phase sigma factor  $\sigma^S$   
37 (RpoS) and thus becomes activated during the entry into the stationary phase of growth [4, 11-  
38 14]. This activation is achieved by the  $\sigma^S$ -dependent induction of the transcriptional regulator  
39 CsgD, which then controls the expression of the *csgBAC* operon that encodes the major curli  
40 subunit CsgA along with the curli nucleator CsgB and the chaperone CsgC [7, 8, 15]. In turn,  
41 *csgD* expression in *E. coli* and *S. Typhimurium* is either directly or indirectly regulated by  
42 multiple cellular factors that mediate responses to diverse environmental changes, including  
43 both global and specific transcriptional regulators, small regulatory RNAs and second  
44 messengers (reviewed in [16-19]).

45 One of the key regulators of *csgD* is the transcription factor MlrA [13, 14, 20, 21]. The activity  
46 of MlrA depends on cellular levels of bacterial second messenger bis-(3'-5')-cyclic dimeric  
47 guanosine monophosphate (c-di-GMP), and in *E. coli* this control is known to be mediated by  
48 a pair of the interacting diguanylate cyclase (DGC) and phosphodiesterase (PDE) enzymes,  
49 DgcM and PdeR, that form a ternary complex with MlrA [12, 14, 22]. MlrA is kept inactive by  
50 binding PdeR, and this interaction is relieved when the latter becomes active as a PDE thus  
51 acting as the trigger enzyme [22, 23]. This inhibition is counteracted by DgcM that locally  
52 produces c-di-GMP to engage PdeR, as well as by the global pool of c-di-GMP. Besides its  
53 enzymatic activity, DgcM might also activate MlrA through direct protein interaction. Another  
54 DGC-PDE pair, DgcE and PdeH, provides global regulatory input into the local DgcM-PdeR-  
55 MlrA regulation [12, 24].

56 Previous studies of *E. coli* macrocolony biofilms formed on agar plates showed that curli  
57 expression occurs in the upper layer of the colony, but even in this layer its expression  
58 remained heterogeneous [25-27], indicating an interplay between global regulation of curli  
59 gene expression by microenvironmental gradients within biofilms and its inherent stochasticity.  
60 Differentiation of *E. coli* into distinct subpopulations of cells either expressing or not expressing  
61 curli was also observed in submerged biofilms formed in liquid cultures, whereby curli  
62 expression was associated with cellular aggregation [28]. Furthermore, bi- or multimodality of  
63 *csgD* reporter activity was also observed in the early stationary phase among planktonic cells  
64 in *S. Typhimurium* [29, 30] and *E. coli* [27]. Given established c-di-GMP-dependent regulation  
65 of CsgD activity, it was proposed that bistable curli expression originates from a toggle switch  
66 created by mutual inhibition between DgcM and PdeR, which could act as a bistable switch  
67 [27, 31].

68 In this study we demonstrate that stochastic differentiation of *E. coli* *csgBAC* operon  
69 expression into distinct subpopulations of curli-positive and -negative cells occurs during the  
70 entry into the stationary phase in a well-stirred planktonic culture, and thus in absence of any  
71 environmental gradients. Similar stochastic and reversible differentiation could be observed  
72 among cells growing in conditioned medium in the microfluidic channel. The upstream  
73 regulation by c-di-GMP is not required to establish the bimodality of curli expression, but it  
74 determines the fraction of curli-positive cells and enhances the stability of curli activation.

75

## 76 **Materials and methods**

### 77 **Bacterial strains and plasmids**

78 All strains and plasmids used in this study are listed in Table S1. Derivative of *E. coli* W3110  
79 [26] that was engineered to encode a chromosomal transcriptional sfGFP reporter downstream  
80 of the *csgA* gene [28] (VS1146) was used here as the wildtype strain. Gene deletions were  
81 obtained with the help of P1 phage transduction using strains of the Keio collection [32] as  
82 donors, and kanamycin resistance cassette was removed using FLP recombinase [33]. For  
83 expression, *dgcE* and *pdeH* genes were cloned into pTrc99A vector [34].

84

### 85 **Growth conditions for planktonic cultures**

86 Planktonic *E. coli* cultures were grown in tryptone broth (TB) medium (10 g tryptone, 5 g NaCl  
87 per liter), supplemented with antibiotics where necessary. Overnight cultures grown at 30°C  
88 were diluted 1:100, unless indicated otherwise, in 5-10 ml of fresh TB and grown at 30°C at  
89 200 rpm in 100 ml flasks in a rotary shaker until indicated OD<sub>600</sub> or overnight (18-25 h; OD<sub>600</sub>  
90 ~ 1.3-1.8). Alternatively, cultures were grown in 96-well plates with linear shaking in a plate  
91 reader, with 200 µl culture per well. Where indicated, bacterial cultures were supplemented  
92 with either 1 mM L-serine (after 6 h of growth) or 0.1–10 mg/l DL-serine hydroxamate at  
93 inoculation.

94

### 95 **Growth and quantification of submerged biofilms**

96 Submerged biofilms were grown and quantified as described previously [28], with minor  
97 modifications. Overnight bacterial cultures grown in TB were diluted 1:100 in fresh TB medium  
98 and grown at 200 rpm and 30°C in a rotary shaker to OD<sub>600</sub> of 0.5. These cultures were then  
99 diluted in fresh TB medium to a final OD<sub>600</sub> of 0.05, and 300 µl was loaded onto a 96-well plate  
100 (Corning Costar, flat bottom; Sigma-Aldrich, Germany) and incubated without shaking at 30°C  
101 for 46 h.

102 For quantification of biofilm formation, the non-attached cells were removed and the wells were  
103 washed once with phosphate-buffered saline (PBS; 8 g NaCl, 0.2 g KCl, 1.44 g Na<sub>2</sub>HPO<sub>4</sub>, 0.24  
104 g KH<sub>2</sub>PO<sub>4</sub>). Attached cells were fixed for 20 min with 300 µl of 96% ethanol, allowed to dry for

105 40 min, and stained with 300  $\mu$ l of 0.1% crystal violet (CV) solution for 15 min at room  
106 temperature. The wells were subsequently washed twice with 1x PBS, incubated with 300  $\mu$ l  
107 of 96% ethanol for 35 min and the CV adsorption was measured at OD<sub>595</sub> using INFINITE M  
108 NANO<sup>+</sup> plate reader (Tecan Group Ltd., Switzerland). These CV values were normalized to  
109 the OD<sub>600</sub> values of the respective biofilm cultures.

110

### 111 **Macrocolony biofilm assay**

112 Macrocolony biofilms were grown as described previously [26]. Briefly, 5  $\mu$ l of the overnight  
113 liquid culture grown at 37°C in lysogeny broth (LB) medium (10 g tryptone, 10 g NaCl, and 5 g  
114 yeast extract per liter) was spotted on salt-free LB agar plates supplemented with Congo red  
115 (40  $\mu$ g/ml). Plates were incubated for 8 days at 28°C.

116

### 117 **Fluorescence measurements**

118 Measurements of GFP expression in an INFINITE M1000 PRO plater reader (Tecan Group  
119 Ltd., Switzerland) were done using fluorescence excitation at 483 nm and emission at 535 nm.  
120 Relative fluorescence was calculated by normalizing to corresponding OD<sub>600</sub> values of the  
121 culture.

122 For fluorescence measurements using flow cytometry, aliquots of 40-300  $\mu$ l of liquid bacterial  
123 cultures were mixed with 2 ml of tethering buffer (10 mM KH<sub>2</sub>PO<sub>4</sub>, 10 mM K<sub>2</sub>HPO<sub>4</sub>, 0.1 mM  
124 EDTA, 1  $\mu$ M L-methionine, 10 mM lactic acid, pH 7.0). Macrocolonies were collected from the  
125 plate, resuspended in 10 ml of tethering buffer and then aliquots of 40  $\mu$ l were mixed with 2 ml  
126 of fresh tethering buffer. Samples were vigorously vortexed and then immediately subjected to  
127 flow cytometric analysis using BD LSRFortessa Sorp cell analyzer (BD Biosciences, Germany)  
128 using 488-nm laser. In each experimental run, 50,000 individual cells were analyzed. Absence  
129 of cell aggregation was confirmed by using forward scatter (FSC) and side scatter (SSC)  
130 parameters. Data were analyzed using FlowJo software version v10.7.1 (FlowJo LLC,  
131 Ashland, OR, US), applying a software-defined background fluorescence subtraction.

132

### 133 **Microfluidics**

134 Conditioned medium was prepared by cultivating wildtype *E. coli* in TB in a rotary shaker at  
135 30°C for 20 h, after which the cell suspension was centrifuged at 4000 rpm for 10 min, medium  
136 was filter-sterilized and stored at 4°C. Mother machine [35] microfluidics device was designed,  
137 fabricated and operated as described in Supporting protocols. *E. coli* cells from the overnight  
138 culture in TB were loaded into the mother machine growth sites by manual infusion of the cell  
139 suspension through one of the two inlets using a 1-ml syringe. Cells were first allowed to grow  
140 at 30 °C for 4 h in fresh TB, then switched to the conditioned TB and cultivated for up to 26 h.  
141 Phase contrast and GFP fluorescence images were acquired using a Nikon Eclipse Ti-E

142 inverted microscope with a time interval of 10 min. Details of image analysis are described in  
143 Supporting protocols.

144

## 145 **Results**

### 146 **Bimodal curli expression is induced in planktonic culture**

147 In order to characterize curli expression in planktonic culture of *E. coli*, we followed the  
148 induction of chromosomal transcriptional reporter of *csgBAC* operon, where the gene encoding  
149 for green fluorescent protein (GFP) was cloned with a strong ribosome binding site as a part  
150 of the same polycistronic RNA downstream of *csgA* [28]. In our previous study of submerged  
151 *E. coli* biofilms, this reporter showed bimodal expression both in the surface-attached biofilm  
152 and in the pellicle at the liquid-air interface [28]. When *E. coli* culture was grown at 30°C in  
153 tryptone broth (TB) liquid medium, this reporter became induced during transition to the  
154 stationary phase (Figure 1A), which is consistent with previous reports [12, 14]. The observed  
155 induction of curli expression occurred at similar density in the cultures with different initial  
156 inoculum size. In both cases the onset of induction apparently coincided with the reduction of  
157 the growth rate, which likely occurs due to depletion of amino acids in the medium and  
158 induction of the stringent response [36, 37], consistent with proposed role of stringent response  
159 in the regulatory cascade leading to curli gene expression [18, 23]. In agreement with that,  
160 curli expression was strongly reduced when *E. coli* culture was grown in a concentrated TB  
161 medium (Figure S1A) or when TB medium was supplemented with serine (Figure S2A).  
162 Moreover, the induction of curli reporter was strongly enhanced by addition of serine  
163 hydroxamate (SHX), which is known to mimic amino acid starvation and induce stringent  
164 response [38] (Figure S2A).

165 In order to investigate whether curli expression was uniform or heterogeneous across  
166 planktonic *E. coli* population, we next measured curli reporter activity in individual cells using  
167 flow cytometry. The reporter was induced only in a fraction of cells, and this bimodality of curli  
168 expression became increasingly more pronounced at later stages of culture growth, reaching  
169 its maximum in the overnight culture (Figure 1B). Thus, the bimodal induction of curli gene  
170 expression is observed not only in biofilms but also in a well-mixed planktonic culture. While  
171 curli activation was more pronounced in a cell culture growing in an orbital shaker (Figure 1B),  
172 bimodality was also observed during culture growth in the plate reader (Figure S1B). Notably,  
173 stimulation of curli expression by SHX or its suppression by additional nutrients affected the  
174 fraction of positive cells rather than their expression levels (Figure S1B and Figure S2B).

175

### 176 **Bimodality of curli expression does not require regulation by c-di-GMP**

177 Subsequently, we investigated dependence of curli expression in planktonic culture on the  
178 upstream regulation by c-di-GMP (Figure 2A). As expected, no activation of curli reporter was

179 observed in the absence of MirA (Figure 2B). Curli expression was also affected by the lack of  
180 enzymes that control MirA activity at the global (DgcE and PdeH) or local (DgcM and PdeR)  
181 level of c-di-GMP regulation (Figure 2C). Consistently with their established regulatory roles,  
182 deletions of cyclase genes *dgcE* and *dgcM* resulted in nearly all cells being curli-negative,  
183 whereas deletions of diesterase genes *pdeH* and *pdeR* led to activation of curli expression in  
184 the majority of cells within the planktonic population. Notably, in all cases a small fraction of  
185 positive (for cyclase knockouts) or negative (for esterase knockouts) cells could be detected,  
186 indicating that neither of these knockouts entirely eliminates the bimodality of curli expression.  
187 This conclusion could be further confirmed by combined deletions of cyclase and diesterase  
188 genes. Removal of the entire global level of c-di-GMP regulation in  $\Delta pdeH \Delta dgcE$  strain led to  
189 a bimodal pattern of curli activation (Figure 2D) that was similar to that observed in the wildtype  
190 cells. Even more surprisingly, the distribution of curli expression remained bimodal upon  
191 removal of the local level of c-di-GMP regulation in  $\Delta pdeR \Delta dgcM$  strain, although the fraction  
192 of curli-positive cells was reduced and heterogeneity of their expression levels increased in  
193 this background. The bimodality of curli expression was also retained in the quadruple  
194 knockout strain lacking all four cyclase and diesterase genes (Figure 2E). Thus, whereas both  
195 global and local c-di-GMP-dependent regulation of MirA activity clearly affect the fraction of  
196 curli-positive cells, they are apparently not required to activate curli expression or to establish  
197 its bimodality in the planktonic cell population.

198 *Vibrio cholerae* transcriptional regulator VpsT, a close homologue of CsgD, has been shown  
199 to be directly regulated by binding to c-di-GMP [39]. Furthermore, in *S. Typhimurium* c-di-GMP  
200 was proposed to regulate *csgD* expression not only at transcriptional but also at a  
201 posttranscriptional level [40]. We thus aimed to verify that *E. coli* curli gene expression was no  
202 longer sensitive to the global cellular level of c-di-GMP in the absence of the local PdeR/DgcM  
203 regulatory module. Indeed, whereas the overexpression of c-di-GMP cyclase DgcE or  
204 phosphodiesterase PdeH had strong impacts on the fraction of curli-positive cells in the  
205 wildtype, the quadruple mutant was insensitive to such overexpression (Figure S3), confirming  
206 that in this background the expression of the *csgBAC* reporter is no longer affected by the  
207 global pool of c-di-GMP.

208

### 209 **Curli activation shows higher variability in absence of c-di-GMP regulation**

210 We next explored how the fraction of curli-positive cells in the population depends on the  
211 conditions of culture growth, with and without regulation by c-di-GMP. As mentioned above,  
212 even in the wildtype strain the fraction of curli-positive cells was smaller in cultures grown in  
213 multi-well plates (Figure S1B) compared to the incubation in the flask in an orbital shaker  
214 (Figure 1B). However, this reduction in the number of curli-positive cells was much more  
215 pronounced for  $\Delta pdeR \Delta dgcM$  or  $\Delta pdeH \Delta dgcE \Delta pdeR \Delta dgcM$  strains, where only a small

216 fraction of cells became positive under these growth conditions (Figure 3A,B and Figure S4).  
217 Also individual *dgc* and *pdh* gene knockout strains showed reduced activation of curli reporter  
218 (Figure S4). Of note, another difference with the flask culture was that the low-fluorescence  
219 peak of the wildtype culture was not fully negative but apparently contained a large fraction of  
220 cells with incompletely activated curli reporter, which could also be seen in  $\Delta pdeH$  or  $\Delta pdeR$   
221 knockouts but not in the  $\Delta pdeH \Delta dgcE \Delta pdeR \Delta dgcM$ ,  $\Delta pdeR \Delta dgcM$  or  $\Delta pdeH \Delta dgcE$  strains  
222 (Figure 3B and Figure S4). Similar results were obtained even upon prolonged incubation in  
223 the plate reader (Figure S5), confirming that the observed difference with the overnight flask  
224 culture was not because of the different growth stage.

225 We further tested reporter activation under growth conditions that favour biofilm formation.  
226 During formation of static submerged biofilms in multi-well plates where cultures are grown  
227 without shaking, the overall curli activation in the populations of  $\Delta pdeH \Delta dgcE$ ,  $\Delta pdeR \Delta dgcM$   
228 or  $\Delta pdeH \Delta dgcE \Delta pdeR \Delta dgcM$  cells (Figure 3C) as well as in the individual knockout strains  
229 (Figure S6A) was comparable to that in the culture grown in the orbital shaker (Figure 2B-E).  
230 Curli gene activation in individual mutant strains correlated well with the levels of submerged  
231 biofilm formation (Figure S6B), although the lack of regulation by c-di-GMP resulted in stronger  
232 reduction of the biofilm biomass, consistent with other roles of c-di-GMP in biofilm formation  
233 besides curli regulation.

234 We also grew all strains in the form of macrocolony biofilms on an agar plate [26]. Interestingly,  
235 here the extent of reporter activation in the  $\Delta pdeR \Delta dgcM$  and  $\Delta pdeH \Delta dgcE \Delta pdeR \Delta dgcM$   
236 strains was much higher and comparable to that of the wildtype (Figure 3D) and even individual  
237  $\Delta dgcE$  and  $\Delta dgcM$  knockouts showed high fraction of curli-positive cells (Figure S7A),  
238 consistent with their stronger Congo red staining compared to the  $\Delta mlrA$  negative control  
239 (Figure S7B). Summarily, these results confirm that the regulation by c-di-GMP is not required  
240 for (bimodal) curli activation, but also suggest that in absence of this control the fraction of  
241 curli-positive cells is more sensitive to growth conditions.

242

### 243 **Curli activation is a stochastic and reversible process stabilized by c-di-GMP**

244 In order to investigate the dynamics of curli activation, and the effects of c-di-GMP regulation,  
245 at the single-cell level, we utilized “mother machine”, a microfluidic device where growth of  
246 individual bacterial cell lineages could be followed in a highly parallelized manner over multiple  
247 generations [35] (Figure 4, Figure S8 and Supporting protocols). To activate curli expression  
248 in continuously growing single cells by mimicking nutrient depletion, *E. coli* wildtype or  $\Delta pdeH$   
249  $\Delta dgcE \Delta pdeR \Delta dgcM$  cells were first loaded into the mother machine from the overnight  
250 culture, allowed to grow in fresh TB medium for several generations and then shifted to the TB  
251 medium that was pre-conditioned by growing the batch culture (see Materials and Methods  
252 and Supporting protocols). For both strains, a fraction of curli-positive cells was observed at

253 the beginning of the experiment since cells originated from the overnight culture, but all cells  
254 turned off curli expression after resuming exponential growth in the fresh medium (Figure 4A,B,  
255 Figure S9, Figure S10, Figure S11, Movie S1 and Movie S2). Following shift to the conditioned  
256 medium, cell growth rate was strongly reduced (Figure 4A,C,E and Figure S9A) to  
257 approximately the same low growth rate for both strains. After several generations of slow  
258 growth in the conditioned medium, individual cells of both strains activated curli expression,  
259 while other cells remained in the curli-off state (Figure 4A,C and Figure S11). Importantly, we  
260 observed that after several generations in the curli-on state, individuals cells of both strains  
261 turned curli expression off again during continuous growth in the conditioned medium (Figure  
262 4B,D and Figure S10), and in some cases there was even a second activation event.  
263 Despite these overall similarities, the dynamics of curli reporter activation showed several  
264 differences between the wildtype and the  $\Delta pdeH \Delta dgcE \Delta pdeR \Delta dgcM$  strain. Most clearly, the  
265 rate of curli activation in individual cells was apparently higher in absence of the c-di-GMP  
266 regulation (Figure 4B,D,F, Figure S10, Figure S12 and Figure S13). Additionally, the induction  
267 showed greater intercellular heterogeneity in the  $\Delta pdeH \Delta dgcE \Delta pdeR \Delta dgcM$  strain (Figure  
268 4F, Figure S10, Figure S12 and Figure S13). Thus, the control of curli expression by c-di-GMP  
269 reduces the rate but increases the stability of curli induction.

270

## 271 **Discussion**

272 Expression of the curli biofilm matrix genes is known to be heterogeneous or even bistable in  
273 communities of *E. coli* [25-28] and *S. Typhimurium* [29, 30], which might have important  
274 functional consequences for the biomechanics of bacterial biofilms [27] and for stress  
275 resistance and virulence of bacterial populations [29, 30]. In the well-structured microcolony  
276 biofilms, differentiation into subpopulations with different levels of the curli matrix production is  
277 largely deterministic and driven by gradients of nutrients and oxygen [18]. Bimodality of curli  
278 expression might also emerge stochastically, in a well-mixed population or between cells within  
279 the same layer of the macrocolony [27, 29, 30]. How this bimodality originates within the  
280 extremely complex regulatory network of curli genes [17, 19, 23, 27] remains a matter of  
281 debate. Although earlier studies in *S. Typhimurium* proposed that bistable expression of curli  
282 might be a consequence of positive transcriptional feedback in *csgD* regulation [29, 30, 41],  
283 the most recently proposed model attributed bistability to the properties of the c-di-GMP  
284 regulatory switch formed by DgcM, PdeR and MlrA [27, 31]. Furthermore, the dynamics of curli  
285 gene expression in individual cells remains unstudied.

286 Here, we investigated the bimodal expression of the major curli *csgBAC* operon at the  
287 population level in the well-stirred planktonic *E. coli* culture as well as on the single-cell level  
288 in the microfluidic device. Consistent with previous studies [12, 14], the induction of curli  
289 expression in growing *E. coli* cell population was observed during the entry into the stationary



290 phase of growth. Curli activation was apparently dependent on depletion of the amino acids  
291 from the medium, since it could be suppressed by increasing the levels of nutrients or,  
292 specifically, of serine. It might thus be related to induction of the stringent response, and  
293 consistently, it was enhanced by the SHX-mediated stimulation of the stringent response.

294 We further observed that activation of the *csgBAC* operon was strongly bimodal under all  
295 tested conditions, even in absence of any nutrient or other gradients. Stochastic nature of this  
296 activation was confirmed by incubation of *E. coli* cells in the microfluidic device, where upon a  
297 shift to the conditioned medium only a fraction of the cell population turned on the curli  
298 expression. Such differentiation is apparently consistent with previous observations of the  
299 bimodal *csgD* expression in *S. Typhimurium* [29, 30] and in *E. coli* [27]. However, whether the  
300 bimodality of the *csgBAC* expression is caused by the bimodal expression of *csgD* remains  
301 clear, since the latter was reported only in the later stationary phase of the culture growth [27,  
302 29, 30], whereas in our experiments the *csgBAC* reporter showed bimodality already at an  
303 earlier stage.

304 In contrast to those previous interpretations of the *csgD* expression pattern as bistability, our  
305 data suggest that curli activation is only transient, and therefore bimodal but not bistable. Under  
306 conditions of continuous cell growth in the microfluidic device, the activation of curli expression  
307 is followed by its inactivation, indicating a pulsatile activation of the curli-positive state. Pulsing  
308 in expression was proposed to be common to many gene regulatory circuits [42], although only  
309 few well-studied examples such as stress response and differentiation in *Bacillus subtilis* [43,  
310 44] are available. Pulsatile expression has also been recently described in *E. coli* for the  
311 upstream regulator of curli, RpoS [45], as well as for the flagellar regulon [46, 47] that is anti-  
312 regulated with curli [28]. However, in neither of these cases did pulsing lead to apparent  
313 bimodality of expression, and their relation to the observed pulses in curli expression thus  
314 remains to be seen.

315 How does such stochastic pulsing of curli expression observed at the single-cell level lead to  
316 the differentiation into two very distinct subpopulations in the batch planktonic culture? This  
317 could be likely explained by the timing of curli activation, and by the duration of these observed  
318 expression pulses: Since the curli expression is only turned-on during transition to the  
319 stationary phase, individual cells can stochastically activate curli genes just before the culture  
320 growth ceases. In contrast to the continuous culture, subsequent reversion to the curli-negative  
321 state by inactivation and dilution by cell division is no longer possible in the stationary batch  
322 culture, and these initially curli-expressing cells will thus remain positive.

323 Importantly, the regulation by c-di-GMP is not required for the bimodal curli expression in *E.*  
324 *coli*, since the differentiation into distinct subpopulations still occurred when the control of CsgD  
325 expression by c-di-GMP was abolished, as observed both in the planktonic cultures and in the  
326 microfluidic device. The level of *csgBAC* expression in curli-positive cells was also little

327 affected by the c-di-GMP control. Nevertheless, this control is important during the  
328 establishment of bimodality: Firstly, global levels of c-di-GMP determine the fraction of curli-  
329 positive cells, via regulation of MrA activity, which is respectively inhibited by PdeR when c-  
330 di-GMP is low and activated by DgcM at high c-di-GMP [22, 23]. Secondly, the c-di-GMP-  
331 dependent control affects the dynamics of curli gene pulsing, with the faster but more  
332 heterogeneous activation of curli expression in the absence of the c-di-GMP control. Thirdly,  
333 and possibly related to the previous observation, this control might also ensure that the fraction  
334 of curli-positive cells is less variable dependent on the growth conditions of *E. coli* population.  
335 Thus, our study reveals a novel regulatory function exhibited by the second messenger c-di-  
336 GMP, in stabilizing the bimodal gene expression.

337

### 338 **Acknowledgements**

339 We thank Sarah Hoch, Silvia González Sierra and Gabriele Malengo for technical help and  
340 advice.

341

### 342 **References**

343

- 344 1. Arnqvist A, Olsen A, Pfeifer J, Russell DG, Normark S. The Crl protein activates cryptic  
345 genes for curli formation and fibronectin binding in *Escherichia coli* HB101. *Mol Microbiol.*  
346 1992;6(17):2443-52. Epub 1992/09/01. doi: 10.1111/j.1365-2958.1992.tb01420.x. PubMed  
347 PMID: 1357528.
- 348 2. Hufnagel DA, Depas WH, Chapman MR. The Biology of the *Escherichia coli* Extracellular  
349 Matrix. *Microbiol Spectr.* 2015;3(3). Epub 2015/07/18. doi: 10.1128/microbiolspec.MB-0014-  
350 2014. PubMed PMID: 26185090; PubMed Central PMCID: PMC4507285.
- 351 3. Larsen P, Nielsen JL, Dueholm MS, Wetzel R, Otzen D, Nielsen PH. Amyloid adhesins  
352 are abundant in natural biofilms. *Environmental Microbiology.* 2007. doi: 10.1111/j.1462-  
353 2920.2007.01418.x.
- 354 4. Romling U, Bian Z, Hammar M, Sierralta WD, Normark S. Curli fibers are highly  
355 conserved between *Salmonella typhimurium* and *Escherichia coli* with respect to operon  
356 structure and regulation. *J Bacteriol.* 1998;180(3):722-31. Epub 1998/02/11. doi:  
357 10.1128/JB.180.3.722-731.1998. PubMed PMID: 9457880; PubMed Central PMCID:  
358 PMC106944.
- 359 5. Vidal O, Longin R, Prigent-Combaret C, Dorel C, Hooreman M, Lejeune P. Isolation of  
360 an *Escherichia coli* K-12 mutant strain able to form biofilms on inert surfaces: involvement of  
361 a new ompR allele that increases curli expression. *J Bacteriol.* 1998;180(9):2442-9. Epub  
362 1998/05/09. doi: 10.1128/JB.180.9.2442-2449.1998. PubMed PMID: 9573197; PubMed  
363 Central PMCID: PMC107187.
- 364 6. Zogaj X, Bokranz W, Nimtz M, Romling U. Production of cellulose and curli fimbriae by  
365 members of the family Enterobacteriaceae isolated from the human gastrointestinal tract.  
366 *Infect Immun.* 2003;71(7):4151-8. Epub 2003/06/24. doi: 10.1128/IAI.71.7.4151-4158.2003.  
367 PubMed PMID: 12819107; PubMed Central PMCID: PMC162016.

- 368 7. Tursi SA, Tukul C. Curli-Containing Enteric Biofilms Inside and Out: Matrix Composition,  
369 Immune Recognition, and Disease Implications. *Microbiol Mol Biol Rev.* 2018;82(4). Epub  
370 2018/10/12. doi: 10.1128/MMBR.00028-18. PubMed PMID: 30305312; PubMed Central  
371 PMCID: PMCPMC6298610.
- 372 8. Chapman MR, Robinson LS, Pinkner JS, Roth R, Heuser J, Hammar M, et al. Role of  
373 *Escherichia coli* curli operons in directing amyloid fiber formation. *Science.*  
374 2002;295(5556):851-5. Epub 2002/02/02. doi: 10.1126/science.1067484. PubMed PMID:  
375 11823641; PubMed Central PMCID: PMCPMC2838482.
- 376 9. Dueholm MS, Albertsen M, Otzen D, Nielsen PH. Curli Functional Amyloid Systems Are  
377 Phylogenetically Widespread and Display Large Diversity in Operon and Protein Structure.  
378 *PLoS ONE.* 2012. doi: 10.1371/journal.pone.0051274.
- 379 10. Gerstel U, Römling U. The *csgD* promoter, a control unit for biofilm formation in  
380 *Salmonella typhimurium*. *Research in Microbiology*2003.
- 381 11. Brombacher E, Baratto A, Dorel C, Landini P. Gene expression regulation by the Curli  
382 activator CsgD protein: modulation of cellulose biosynthesis and control of negative  
383 determinants for microbial adhesion. *J Bacteriol.* 2006;188(6):2027-37. Epub 2006/03/04. doi:  
384 10.1128/JB.188.6.2027-2037.2006. PubMed PMID: 16513732; PubMed Central PMCID:  
385 PMCPMC1428138.
- 386 12. Pesavento C, Becker G, Sommerfeldt N, Possling A, Tschowri N, Mehlis A, et al. Inverse  
387 regulatory coordination of motility and curli-mediated adhesion in *Escherichia coli*. *Genes Dev.*  
388 2008;22(17):2434-46. Epub 2008/09/04. doi: 10.1101/gad.475808. PubMed PMID: 18765794;  
389 PubMed Central PMCID: PMCPMC2532929.
- 390 13. Romling U, Rohde M, Olsen A, Normark S, Reinkoster J. AgfD, the checkpoint of  
391 multicellular and aggregative behaviour in *Salmonella typhimurium* regulates at least two  
392 independent pathways. *Mol Microbiol.* 2000;36(1):10-23. Epub 2000/04/12. doi:  
393 10.1046/j.1365-2958.2000.01822.x. PubMed PMID: 10760159.
- 394 14. Weber H, Pesavento C, Possling A, Tischendorf G, Hengge R. Cyclic-di-GMP-mediated  
395 signalling within the sigma network of *Escherichia coli*. *Mol Microbiol.* 2006;62(4):1014-34.  
396 Epub 2006/10/03. doi: 10.1111/j.1365-2958.2006.05440.x. PubMed PMID: 17010156.
- 397 15. Barnhart MM, Chapman MR. Curli biogenesis and function. *Annu Rev Microbiol.*  
398 2006;60:131-47. Epub 2006/05/18. doi: 10.1146/annurev.micro.60.080805.142106. PubMed  
399 PMID: 16704339; PubMed Central PMCID: PMCPMC2838481.
- 400 16. Ishihama A. Prokaryotic genome regulation: Multifactor promoters, multitarget  
401 regulators and hierarchic networks. *FEMS Microbiology Reviews*2010.
- 402 17. Rossi E, Cimmins A, Luthje P, Brauner A, Sjöling A, Landini P, et al. "It's a gut feeling" -  
403 *Escherichia coli* biofilm formation in the gastrointestinal tract environment. *Crit Rev Microbiol.*  
404 2018;44(1):1-30. Epub 2017/05/10. doi: 10.1080/1040841X.2017.1303660. PubMed PMID:  
405 28485690.
- 406 18. Serra DO, Hengge R. Bacterial Multicellularity: The Biology of *Escherichia coli* Building  
407 Large-Scale Biofilm Communities. *Annu Rev Microbiol.* 2021;75:269-90. Epub 2021/08/04.  
408 doi: 10.1146/annurev-micro-031921-055801. PubMed PMID: 34343018.
- 409 19. Simm R, Ahmad I, Rhen M, Le Guyon S, Romling U. Regulation of biofilm formation in  
410 *Salmonella enterica* serovar Typhimurium. *Future Microbiol.* 2014;9(11):1261-82. Epub  
411 2014/12/02. doi: 10.2217/fmb.14.88. PubMed PMID: 25437188.
- 412 20. Brown PK, Dozois CM, Nickerson CA, Zuppardo A, Terlonge J, Curtiss R. MlrA, a novel  
413 regulator of curli (Agf) and extracellular matrix synthesis by *Escherichia coli* and *Salmonella*

- 414 *enterica* serovar Typhimurium. Molecular Microbiology. 2001. doi: 10.1046/j.1365-  
415 2958.2001.02529.x.
- 416 21. Ogasawara H, Yamada K, Kori A, Yamamoto K, Ishihama A. Regulation of the  
417 *Escherichia coli* *csgD* promoter: Interplay between five transcription factors. Microbiology.  
418 2010. doi: 10.1099/mic.0.039131-0.
- 419 22. Lindenberg S, Klauck G, Pesavento C, Klauck E, Hengge R. The EAL domain protein YciR  
420 acts as a trigger enzyme in a c-di-GMP signalling cascade in *E. coli* biofilm control. EMBO J.  
421 2013;32(14):2001-14. Epub 2013/05/28. doi: 10.1038/emboj.2013.120. PubMed PMID:  
422 23708798; PubMed Central PMCID: PMC3715855.
- 423 23. Hengge R. Linking bacterial growth, survival, and multicellularity - small signaling  
424 molecules as triggers and drivers. Curr Opin Microbiol. 2020;55:57-66. Epub 2020/04/04. doi:  
425 10.1016/j.mib.2020.02.007. PubMed PMID: 32244175.
- 426 24. Sarenko O, Klauck G, Wilke FM, Pfiffer V, Richter AM, Herbst S, et al. More than  
427 Enzymes That Make or Break Cyclic Di-GMP-Local Signaling in the Interactome of GGDEF/EAL  
428 Domain Proteins of *Escherichia coli*. mBio. 2017;8(5). Epub 2017/10/12. doi:  
429 10.1128/mBio.01639-17. PubMed PMID: 29018125; PubMed Central PMCID:  
430 PMC5635695.
- 431 25. DePas WH, Hufnagel DA, Lee JS, Blanco LP, Bernstein HC, Fisher ST, et al. Iron induces  
432 bimodal population development by *Escherichia coli*. Proc Natl Acad Sci U S A.  
433 2013;110(7):2629-34. Epub 2013/01/30. doi: 10.1073/pnas.1218703110. PubMed PMID:  
434 23359678; PubMed Central PMCID: PMC3574911.
- 435 26. Serra DO, Richter AM, Klauck G, Mika F, Hengge R. Microanatomy at cellular resolution  
436 and spatial order of physiological differentiation in a bacterial biofilm. mBio.  
437 2013;4(2):e00103-13. Epub 2013/03/21. doi: 10.1128/mBio.00103-13. PubMed PMID:  
438 23512962; PubMed Central PMCID: PMC3604763.
- 439 27. Serra DO, Hengge R. A c-di-GMP-Based Switch Controls Local Heterogeneity of  
440 Extracellular Matrix Synthesis which Is Crucial for Integrity and Morphogenesis of *Escherichia*  
441 *coli* Macrocolony Biofilms. J Mol Biol. 2019;431(23):4775-93. Epub 2019/04/08. doi:  
442 10.1016/j.jmb.2019.04.001. PubMed PMID: 30954572.
- 443 28. Besharova O, Suchanek VM, Hartmann R, Drescher K, Sourjik V. Diversification of gene  
444 expression during formation of static submerged biofilms by *Escherichia coli*. Frontiers in  
445 Microbiology. 2016. doi: 10.3389/fmicb.2016.01568.
- 446 29. Grantcharova N, Peters V, Monteiro C, Zakikhany K, Römling U. Bistable expression of  
447 CsgD in biofilm development of *Salmonella enterica* serovar Typhimurium. Journal of  
448 Bacteriology. 2010. doi: 10.1128/JB.01826-08.
- 449 30. MacKenzie KD, Wang Y, Shivak DJ, Wong CS, Hoffman LJ, Lam S, et al. Bistable  
450 expression of CsgD in *Salmonella enterica* serovar Typhimurium connects virulence to  
451 persistence. Infect Immun. 2015;83(6):2312-26. Epub 2015/04/01. doi: 10.1128/IAI.00137-15.  
452 PubMed PMID: 25824832; PubMed Central PMCID: PMC4432751.
- 453 31. Yousef KP, Streck A, Schütte C, Siebert H, Hengge R, von Kleist M. Logical-continuous  
454 modelling of post-translationally regulated bistability of curli fiber expression in *Escherichia*  
455 *coli*. BMC Systems Biology. 2015. doi: 10.1186/s12918-015-0183-x.
- 456 32. Baba T, Ara T, Hasegawa M, Takai Y, Okumura Y, Baba M, et al. Construction of  
457 *Escherichia coli* K-12 in-frame, single-gene knockout mutants: the Keio collection. Mol Syst  
458 Biol. 2006;2:2006 0008. Epub 2006/06/02. doi: 10.1038/msb4100050. PubMed PMID:  
459 16738554; PubMed Central PMCID: PMC1681482.

- 460 33. Cherepanov PP, Wackernagel W. Gene disruption in *Escherichia coli*: TcR and KmR  
461 cassettes with the option of Flp-catalyzed excision of the antibiotic-resistance determinant.  
462 Gene. 1995;158(1):9-14. Epub 1995/05/26. doi: 10.1016/0378-1119(95)00193-a. PubMed  
463 PMID: 7789817.
- 464 34. Amann E, Ochs B, Abel K-J. Tightly regulated tac promoter vectors useful for the  
465 expression of unfused and fused proteins in *Escherichia coli*. Gene. 1988;69(2):301-15. doi:  
466 [https://doi.org/10.1016/0378-1119\(88\)90440-4](https://doi.org/10.1016/0378-1119(88)90440-4).
- 467 35. Wang P, Robert L, Pelletier J, Dang WL, Taddei F, Wright A, et al. Robust growth of  
468 *Escherichia coli*. Curr Biol. 2010;20(12):1099-103. Epub 2010/06/12. doi:  
469 10.1016/j.cub.2010.04.045. PubMed PMID: 20537537; PubMed Central PMCID:  
470 PMCPMC2902570.
- 471 36. Potrykus K, Cashel M. (p)ppGpp: still magical? Annu Rev Microbiol. 2008;62:35-51.  
472 Epub 2008/05/06. doi: 10.1146/annurev.micro.62.081307.162903. PubMed PMID: 18454629.
- 473 37. Varik V, Oliveira SRA, Hauryliuk V, Tenson T. HPLC-based quantification of bacterial  
474 housekeeping nucleotides and alarmone messengers ppGpp and pppGpp. Sci Rep.  
475 2017;7(1):11022. Epub 2017/09/10. doi: 10.1038/s41598-017-10988-6. PubMed PMID:  
476 28887466; PubMed Central PMCID: PMCPMC5591245.
- 477 38. Patacq C, Chaudet N, Letisse F. Crucial Role of ppGpp in the Resilience of *Escherichia*  
478 *coli* to Growth Disruption. mSphere. 2020;5(6). Epub 2020/12/29. doi:  
479 10.1128/mSphere.01132-20. PubMed PMID: 33361126; PubMed Central PMCID:  
480 PMCPMC7763551.
- 481 39. Krasteva PV, Fong JC, Shikuma NJ, Beyhan S, Navarro MV, Yildiz FH, et al. *Vibrio*  
482 *cholerae* VpsT regulates matrix production and motility by directly sensing cyclic di-GMP.  
483 Science. 2010;327(5967):866-8. Epub 2010/02/13. doi: 10.1126/science.1181185. PubMed  
484 PMID: 20150502; PubMed Central PMCID: PMCPMC2828054.
- 485 40. Ahmad I, Cimdins A, Beske T, Romling U. Detailed analysis of c-di-GMP mediated  
486 regulation of csgD expression in *Salmonella typhimurium*. BMC Microbiol. 2017;17(1):27. Epub  
487 2017/02/06. doi: 10.1186/s12866-017-0934-5. PubMed PMID: 28148244; PubMed Central  
488 PMCID: PMCPMC5289004.
- 489 41. Gualdi L, Tagliabue L, Landini P. Biofilm formation-gene expression relay system in  
490 *Escherichia coli*: modulation of sigmaS-dependent gene expression by the CsgD regulatory  
491 protein via sigmaS protein stabilization. J Bacteriol. 2007;189(22):8034-43. Epub 2007/09/18.  
492 doi: 10.1128/JB.00900-07. PubMed PMID: 17873038; PubMed Central PMCID:  
493 PMCPMC2168689.
- 494 42. Levine JH, Lin Y, Elowitz MB. Functional roles of pulsing in genetic circuits. Science.  
495 2013;342(6163):1193-200. Epub 2013/12/07. doi: 10.1126/science.1239999. PubMed PMID:  
496 24311681; PubMed Central PMCID: PMCPMC4100686.
- 497 43. Locke JC, Young JW, Fontes M, Hernandez Jimenez MJ, Elowitz MB. Stochastic pulse  
498 regulation in bacterial stress response. Science. 2011;334(6054):366-9. Epub 2011/10/08. doi:  
499 10.1126/science.1208144. PubMed PMID: 21979936; PubMed Central PMCID:  
500 PMCPMC4100694.
- 501 44. Levine JH, Fontes ME, Dworkin J, Elowitz MB. Pulsed feedback defers cellular  
502 differentiation. PLoS Biol. 2012;10(1):e1001252. Epub 2012/02/04. doi:  
503 10.1371/journal.pbio.1001252. PubMed PMID: 22303282; PubMed Central PMCID:  
504 PMCPMC3269414.
- 505 45. Patange O, Schwall C, Jones M, Villava C, Griffith DA, Phillips A, et al. *Escherichia coli*  
506 can survive stress by noisy growth modulation. Nat Commun. 2018;9(1):5333. Epub

507 2018/12/19. doi: 10.1038/s41467-018-07702-z. PubMed PMID: 30559445; PubMed Central  
508 PMCID: PMCPMC6297224.

509 46. Kim JM, Garcia-Alcala M, Balleza E, Cluzel P. Stochastic transcriptional pulses  
510 orchestrate flagellar biosynthesis in *Escherichia coli*. Sci Adv. 2020;6(6):eaax0947. Epub  
511 2020/02/23. doi: 10.1126/sciadv.aax0947. PubMed PMID: 32076637; PubMed Central  
512 PMCID: PMCPMC7002133.

513 47. Sassi AS, Garcia-Alcala M, Kim MJ, Cluzel P, Tu Y. Filtering input fluctuations in intensity  
514 and in time underlies stochastic transcriptional pulses without feedback. Proc Natl Acad Sci U  
515 S A. 2020;117(43):26608-15. Epub 2020/10/14. doi: 10.1073/pnas.2010849117. PubMed  
516 PMID: 33046652; PubMed Central PMCID: PMCPMC7604450.

517

518

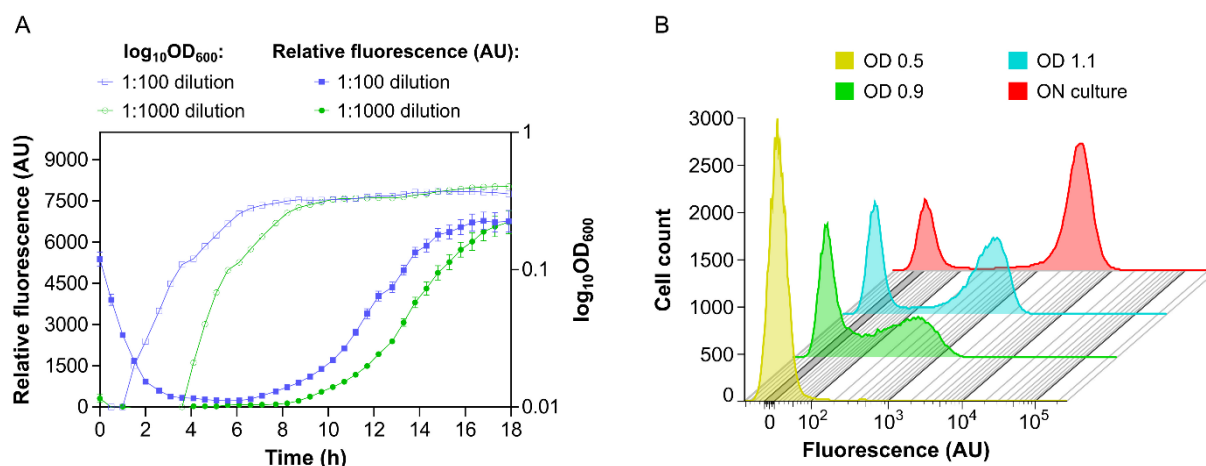

519  
520 **Figure 1: Bimodal activation of curli gene expression in *E. coli* planktonic cultures.** *E. coli* cells  
521 carrying genomic transcriptional reporter of *csgBAC* operon were grown in liquid tryptone broth (TB)  
522 medium at 30 °C under constant shaking. **(A)** Optical density (OD<sub>600</sub>) and relative fluorescence  
523 (fluorescence/OD<sub>600</sub>; AU, arbitrary units) of the culture during growth in a plate reader, starting from two  
524 different dilutions of the overnight culture. Error bars indicate standard error of the mean (SEM) of 10  
525 technical replicates. **(B)** Distribution of single-cell fluorescence levels in cultures grown to indicated  
526 OD<sub>600</sub> or overnight (ON; 25 h) in an orbital shaker, measured by flow cytometry.

527  
528

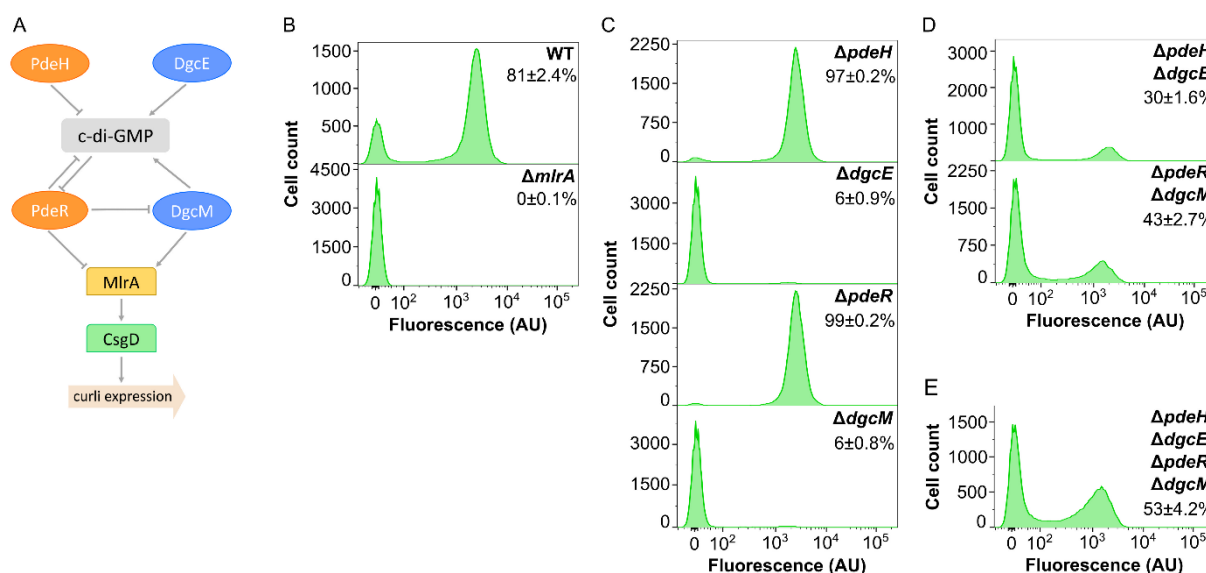

529  
 530 **Figure 2: Regulation of curli expression by c-di-GMP.** (A) Current model of regulation of curli gene  
 531 expression by c-di-GMP in *E. coli*, adapted from [27]. The regulation is mediated by two pairs of  
 532 diguanylate cyclases (DGCs; blue) and phosphodiesterases (PDEs; orange). PdeH and DgcE control  
 533 global level of c-di-GMP, whereas PdeR and DgcM mediate local c-di-GMP-dependent regulation of  
 534 curli gene expression by controlling activity of transcription factor MirA, which activates another curli-  
 535 specific transcription factor CsgD. (B-E) Flow cytometry measurements of curli gene expression in *E.*  
 536 *coli* planktonic cultures grown overnight in flasks in an orbital shaker, shown for the wildtype (WT) and  
 537  $\Delta mlrA$  knockout (B), and individual (C), double (D) and quadruple (E) knockouts of DGC or PDE  
 538 enzymes, as indicated. Fraction of positive cells in the population (mean of three biological replicates  $\pm$   
 539 SEM) is indicated for each strain. Note that the scale in the y axes is different for individual strains to  
 540 improve readability.



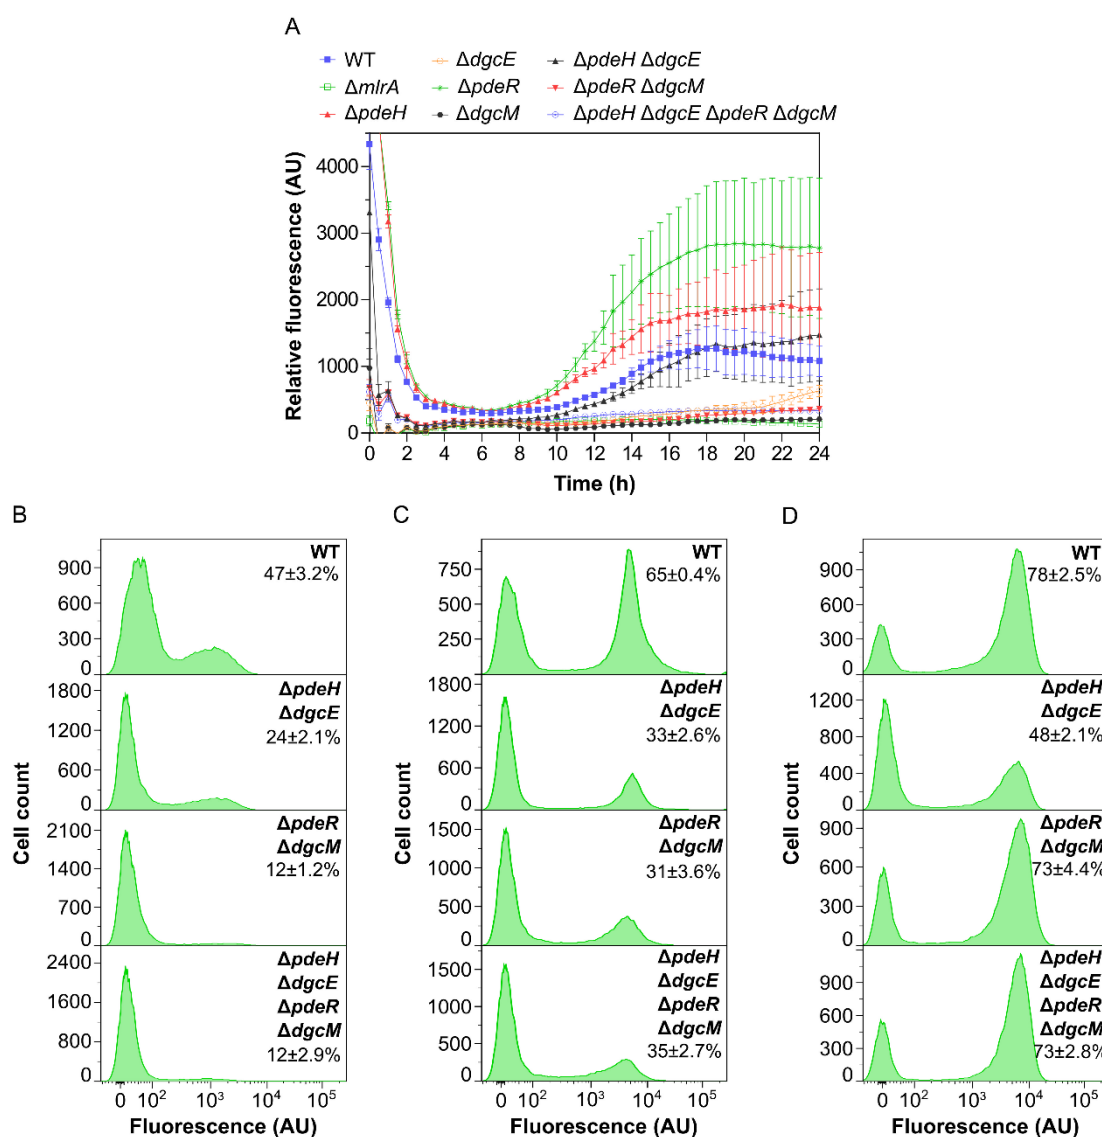

541  
 542 **Figure 3: Dependence of curli expression on c-di-GMP regulation under different growth**  
 543 **conditions. (A)** Relative fluorescence of transcriptional curli reporter in planktonic culture grown in a  
 544 plate reader. Error bars indicate SEM of 5 technical replicates. **(B-D)** Flow cytometry measurements of  
 545 curli expression in the wildtype (WT) and indicated knockout strains after 24 h of growth either in a plate  
 546 reader (B), as submerged biofilms (C) or as macrocolony biofilms (D). Measurements for other knock-  
 547 outs are shown in Figures S4, S6A, S7A. Fraction of positive cells in the population (mean of three  
 548 biological replicates  $\pm$  SEM) is indicated for each strain. Note that the scale in the y axes is different for  
 549 individual strains to improve readability.

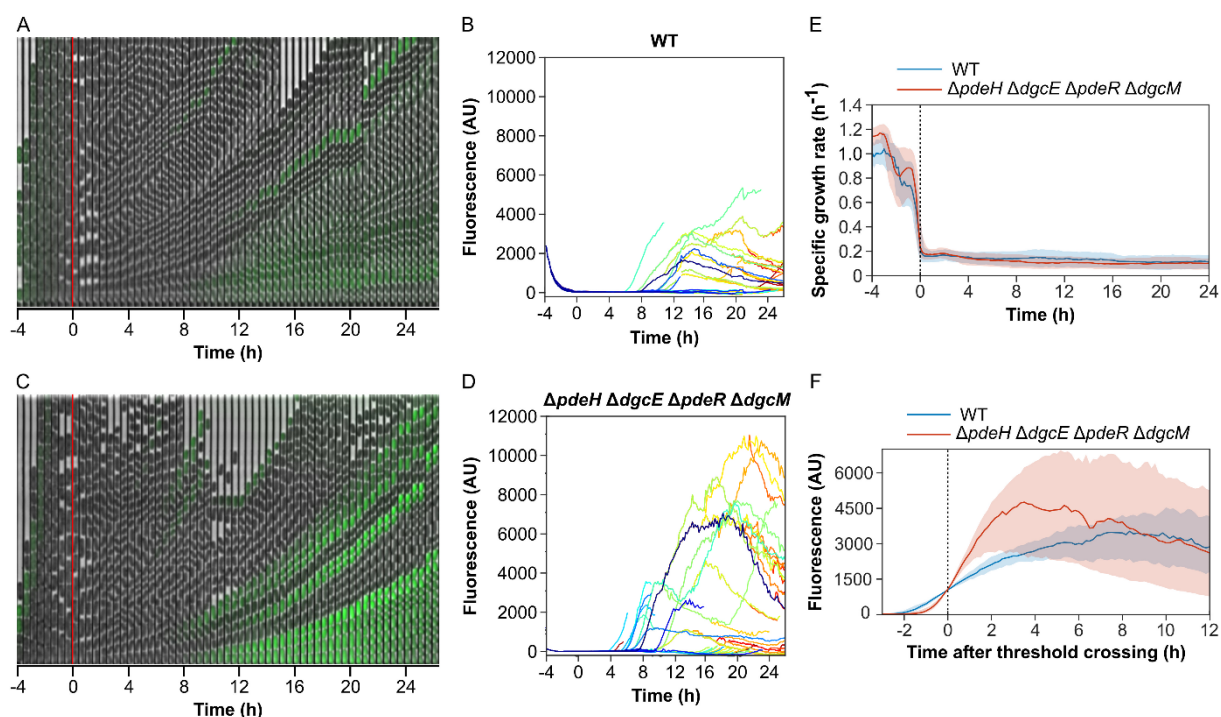

550  
 551 **Figure 4: Impact of c-di-GMP regulation on dynamics of curli induction in individual cells.** *E. coli*  
 552 cells in a microfluidic device (mother machine) were shifted from a fresh to conditioned TB medium after  
 553 4 h of growth to induce curli expression. **(A-D)** Examples of image time series and single-cell  
 554 fluorescence traces for the wildtype (WT) (A,B) and for the  $\Delta pdeH \Delta dgcE \Delta pdeR \Delta dgcM$  strain disabled  
 555 in the c-di-GMP regulation (C,D) growing in a mother machine in one experiment. Expression of the curli  
 556 reporter is indicated by the green overlay on the phase contrast image. **(E)** Median instantaneous growth  
 557 rate — fold rate of change in length — of cells grown in microfluidics experiments as described in (A).  
 558 The switch to conditioned medium is at time zero, as indicated. Shaded area is the interquartile range.  
 559 The number of cells in the device varies with time, but is on average  $n = 296$  for WT and  $n = 522$  for the  
 560 quadruple knockout. **(F)** Median curli expression profile for single-cell traces aligned by the time at which  
 561 they exceed a threshold of  $10^3$  fluorescence units. Shaded area is interquartile range;  $n = 128$  for WT  
 562 and 230 for the quadruple knockout.

563 **Supporting information**

564

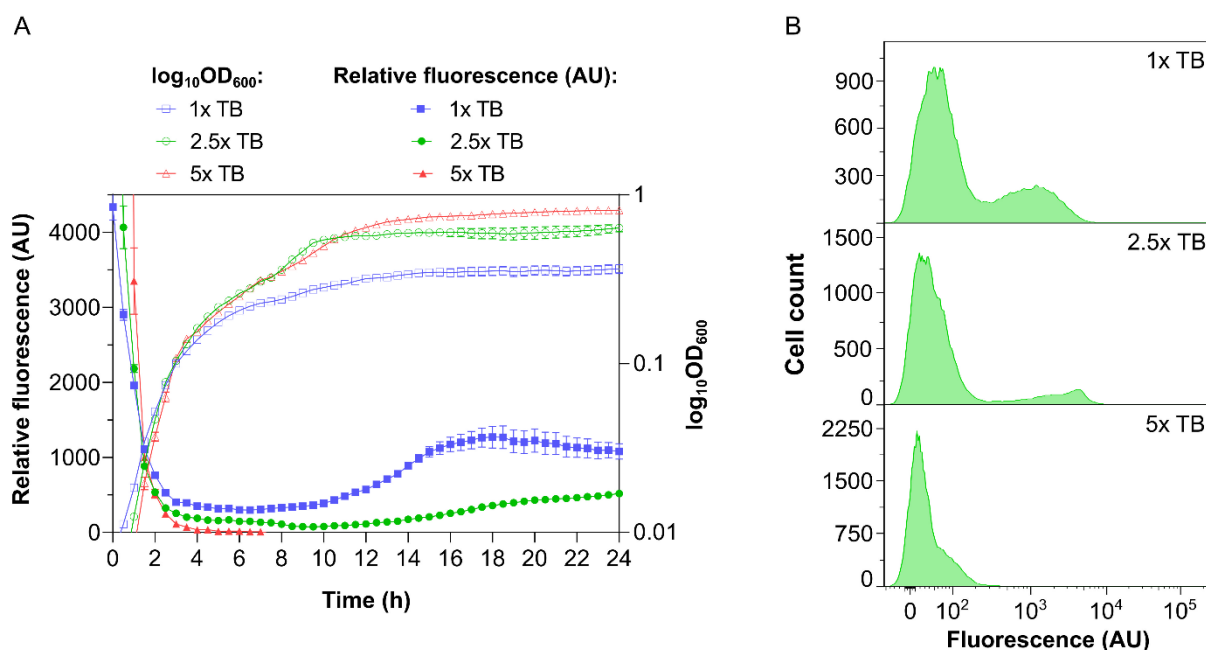

565

566 **Figure S1: Dependence of curli gene expression on nutrient levels.** Wildtype *E. coli* cultures were  
567 grown as in Figure 1A but with different indicated concentrations of TB. **(A)** Bacterial growth and activity  
568 of transcriptional curli reporter. Error bars indicate SEM of 6 technical replicates. **(B)** Distribution of  
569 single-cell fluorescence levels after 24 h of growth in a plate reader measured by flow cytometry. Note  
570 that the scale in the y axes is different for individual conditions to improve readability.

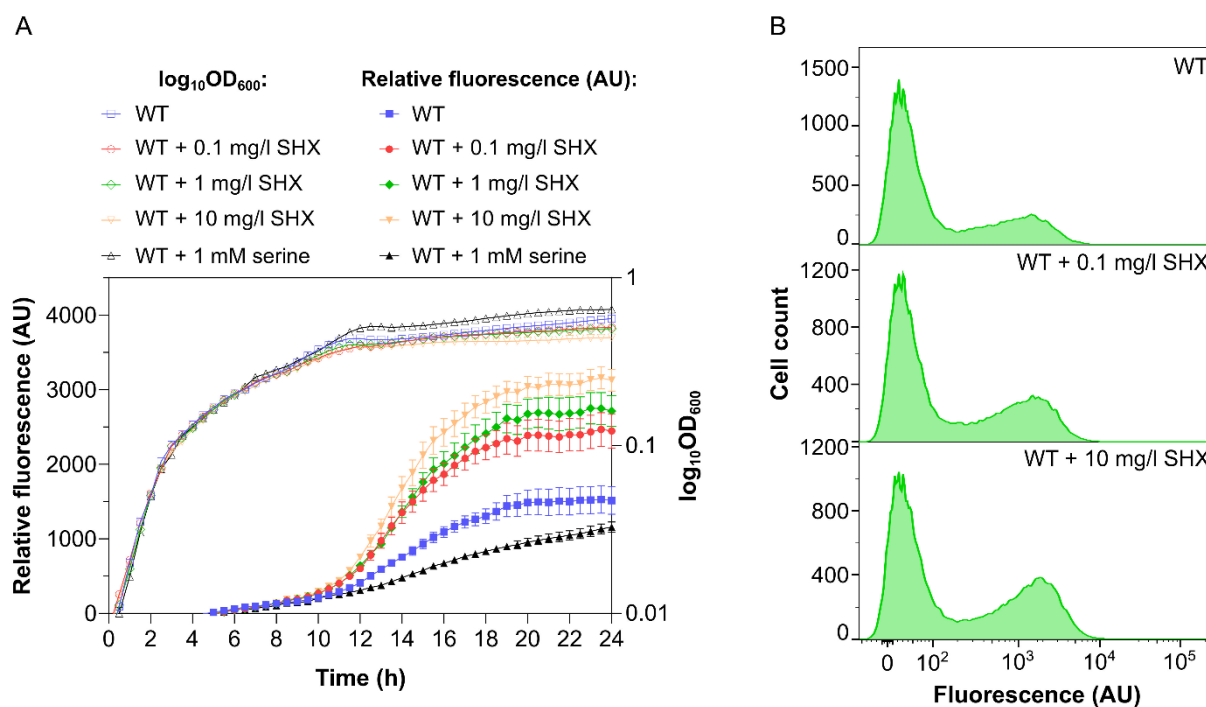

571  
572 **Figure S2: Stimulation of curli gene expression by stringent response.** Wildtype *E. coli* cultures  
573 were grown as in Figure 1A but with addition of either indicated concentrations of serine hydroxamate  
574 (SHX) at inoculation point or 1 mM serine after 6 h of growth. **(A)** Bacterial growth and activity of  
575 transcriptional curli reporter. Error bars indicate SEM of 6 technical replicates. **(B)** Distribution of single-  
576 cell fluorescence levels after 24 h of growth in a plate reader measured by flow cytometry. Note that the  
577 scale in the y axes is different for individual conditions to improve readability.

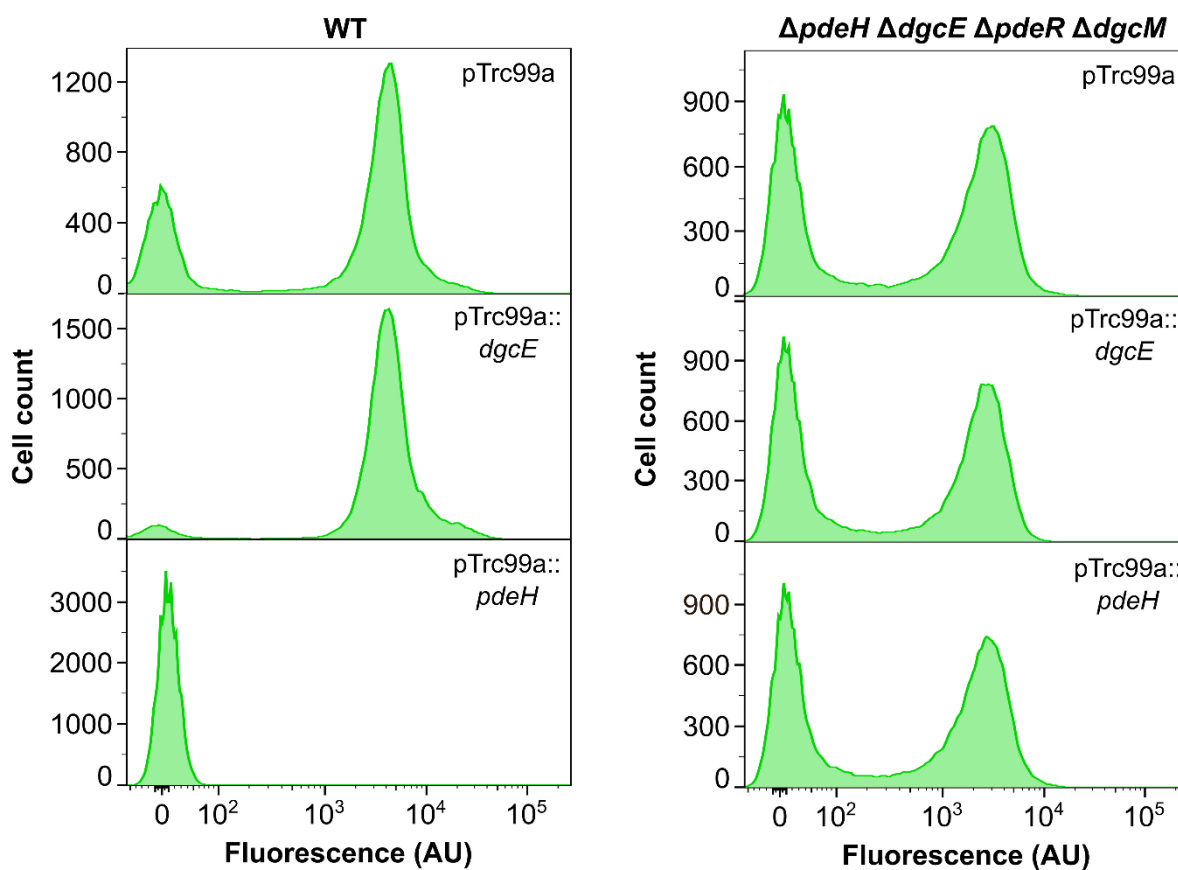

578

579 **Figure S3: Decoupling of curli gene expression from c-di-GMP regulation in the absence of PdeR/**  
580 **DgcM regulatory module.** *E. coli* wildtype (WT) cells or cells lacking c-di-GMP regulatory enzymes  
581 ( $\Delta pdeH \Delta dgcE \Delta pdeR \Delta dgcM$ ) were transformed with either empty pTrc99a plasmid (control) or with  
582 pTrc99a plasmid carrying *dgcE* (pTrc99a::dgcE) or *pdeH* (pTrc99a::pdeH) genes. Expression from the  
583 vector was induced with 1  $\mu$ M IPTG. Bacteria were grown overnight in flasks with shaking and cultures  
584 were subjected to the flow cytometry analysis. Note that the scale in the y axes is different for individual  
585 strains to improve readability.

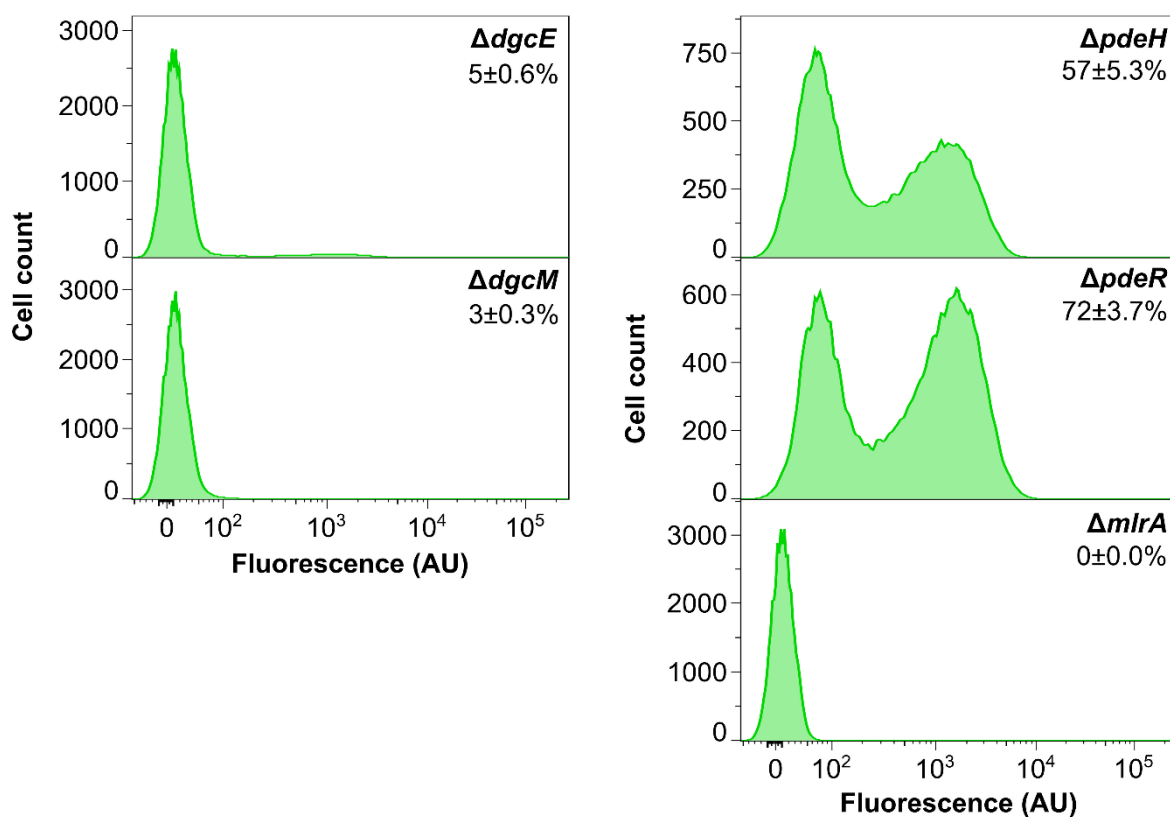

586  
587  
588  
589  
590  
591

**Figure S4: Curli gene expression in cultures grown in a plate reader.** *E. coli* cells were grown as in Figure 3A,B. Flow cytometry measurements for indicated knockouts are shown. Measurements in other strains are shown in Figure 3B. Fraction of positive cells in the population (mean of three biological replicates ± SEM) is indicated for each strain. Note that the scale in the y axes is different for individual strains to improve readability.

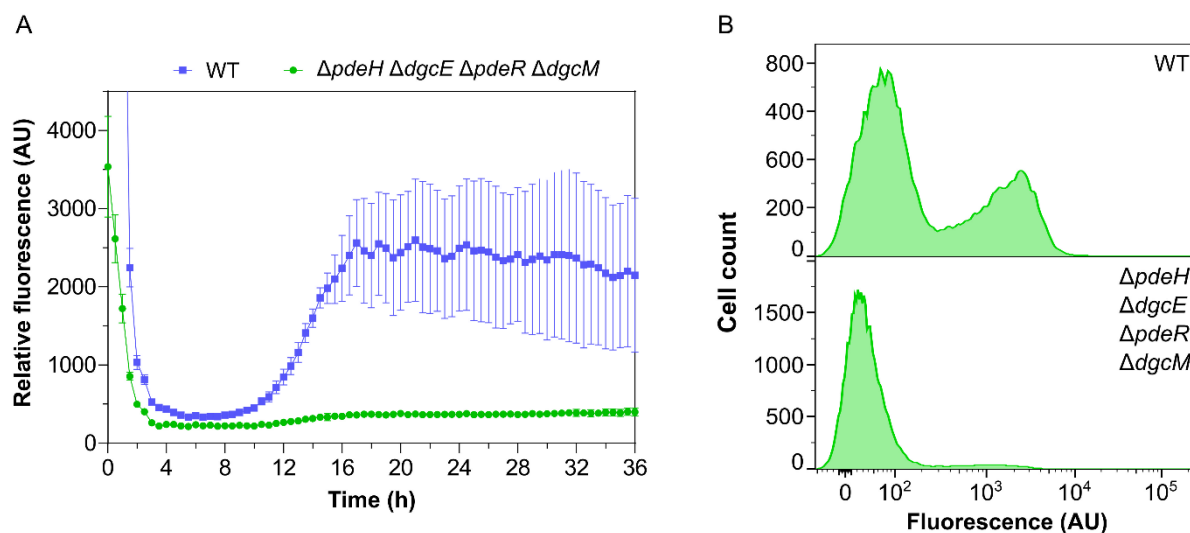

592

593 **Figure S5: Curli gene expression upon prolonged cultivation in a plate reader.** Wildtype (WT) and  
594 ( $\Delta pdeH \Delta dgcE \Delta pdeR \Delta dgcM$ ) knockout strains were grown in a plate reader as in Figure 2 A,B, but for  
595 36 h. **(A)** Induction of transcriptional curli reporter. Error bars indicate SEM of 10 technical replicates.  
596 **(B)** Distribution of single-cell fluorescence levels in populations of both strains after 36 h of growth  
597 measured by flow cytometry.

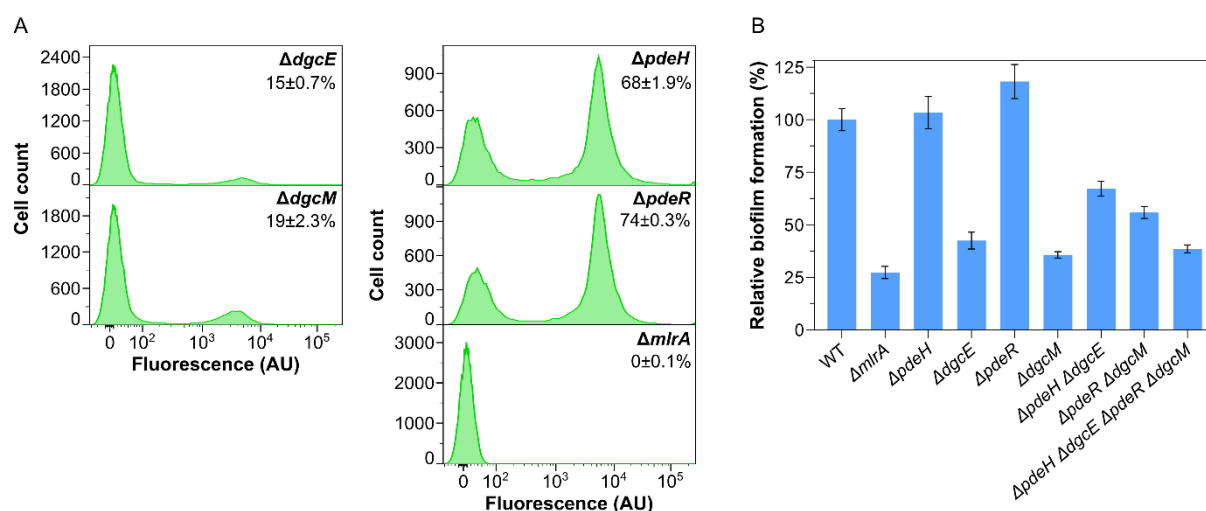

598

599 **Figure S6: Curli gene expression in submerged biofilm cultures.** (A) Distribution of single-cell  
600 fluorescence levels in populations of indicated knockout strains after 46 h of submerged biofilm culture  
601 growth, measured by flow cytometry. Measurements in other strains are shown in Figure 3C. Fraction  
602 of positive cells in the population (mean of three biological replicates  $\pm$  SEM) is indicated for each strain.  
603 Note that the scale in the y axes is different for individual strains to improve readability. (B) Biofilm  
604 formation by indicated strains, quantified using crystal violet (CV) staining. Error bars indicate SEM of 3  
605 independent replicates.



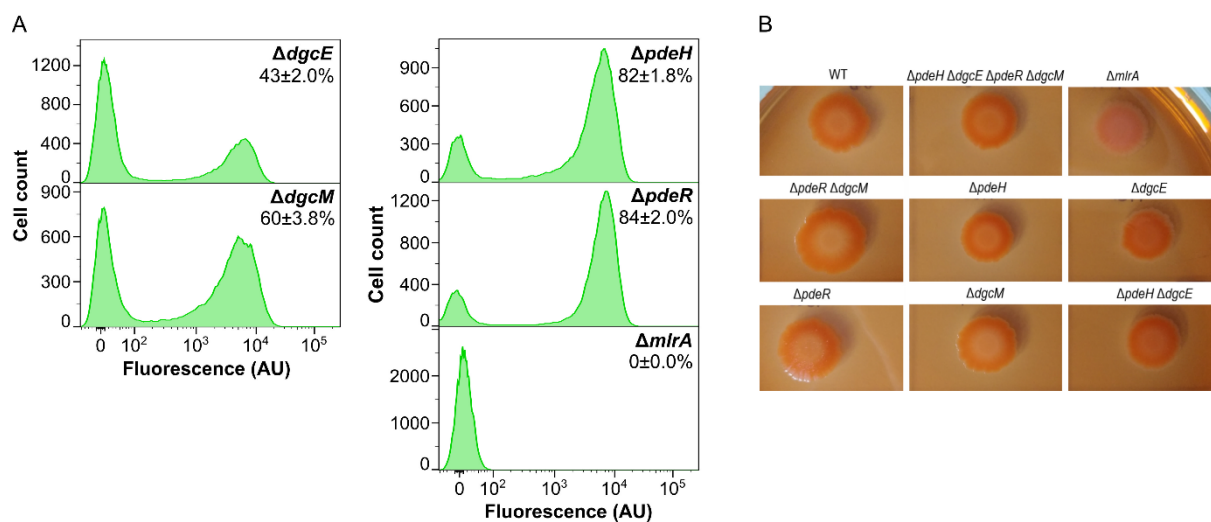

606

607 **Figure S7: Curli expression in macrocolony biofilms. (A,B)** Flow cytometry measurements of curli  
608 expression (A) and images of microcolonies of indicated strains (B) after 8 days of growth. Flow  
609 cytometry measurements for other strains are shown in Figure 3D. Fraction of positive cells in the  
610 population (mean of three biological replicates  $\pm$  SEM) is indicated for each strain. Note that the scale  
611 in the y axes is different for individual strains to improve readability.

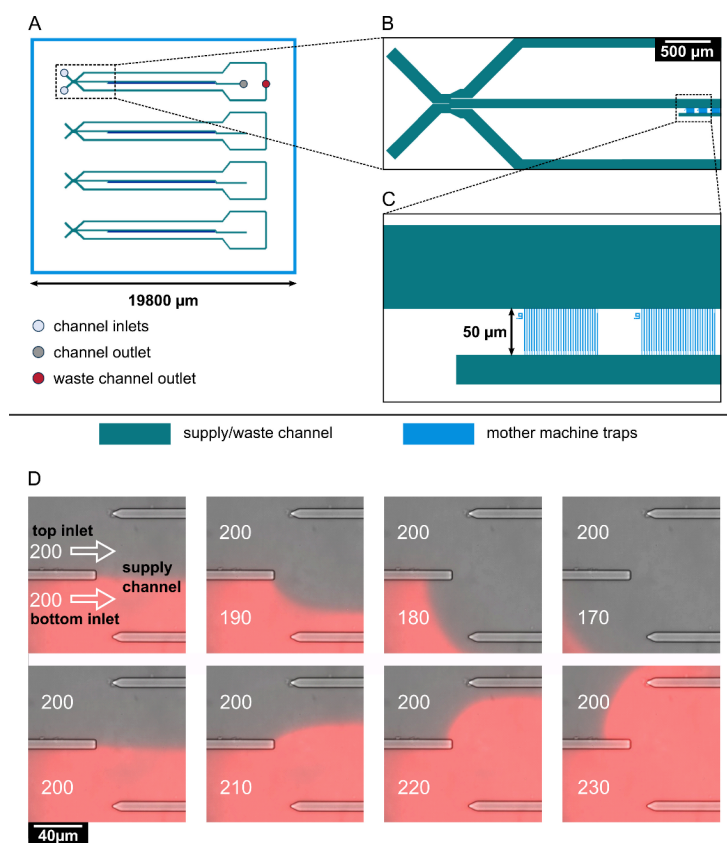

612

613 **Figure S8: Design of the microfluidic mother machine chip.** (A) Schematic overview on the channel  
 614 layout, featuring four supply channels (green) for cell inoculation and media supply. (B) Detailed view  
 615 of the area marked by a rectangle in (A), showing the switching junction and a part of the mother machine  
 616 cultivation sites (blue). The junction is formed by two inlets, leading to one central supply channel. The  
 617 control of the pressure at each inlet allows to choose the medium flowing through the supply channel,  
 618 and, ultimately, to the mother machine cultivation sites. Residual medium flows out through the waste  
 619 channels located on both sides from the central channel. Medium flowing through the supply channel  
 620 exits the chip through one outlet. (C) Detailed view of the area marked in (B) by a rectangle, showing  
 621 the mother machine cultivation sites. Each of the four channels contains 57 mother machine cultivation  
 622 sites, which contain 30 mother machine traps with widths of 0.9, 1, or 1.1  $\mu\text{m}$ . The mother machine traps  
 623 feature a 0.3  $\mu\text{m}$  wide constriction on the bottom, preventing the mother cell from exiting the trap while  
 624 allowing medium perfusion. The supply channels (green) are 8  $\mu\text{m}$  in depth, the mother machine traps  
 625 (blue) are 0.8  $\mu\text{m}$  in depth. (D) On-chip medium switching visualized by merged phase contrast and  
 626 mCherry images of the channel junction. Media are supplied through separate inlets (top and bottom),  
 627 which are separated in the center of the channel by a PDMS barrier. The direction of flow is indicated  
 628 by white arrows. Water was supplied through the top inlet, while a 0.2  $\mu\text{M}$  sulforhodamine B solution  
 629 was supplied through the bottom inlet, visualizing the flow pattern in the junction. The pressure at the  
 630 top inlet was kept constant at 200 mbar. Depending on the pressure set at the bottom inlet, it is possible  
 631 to select which one of the two media flows into the central supply channel to the mother machine growth  
 632 sites.

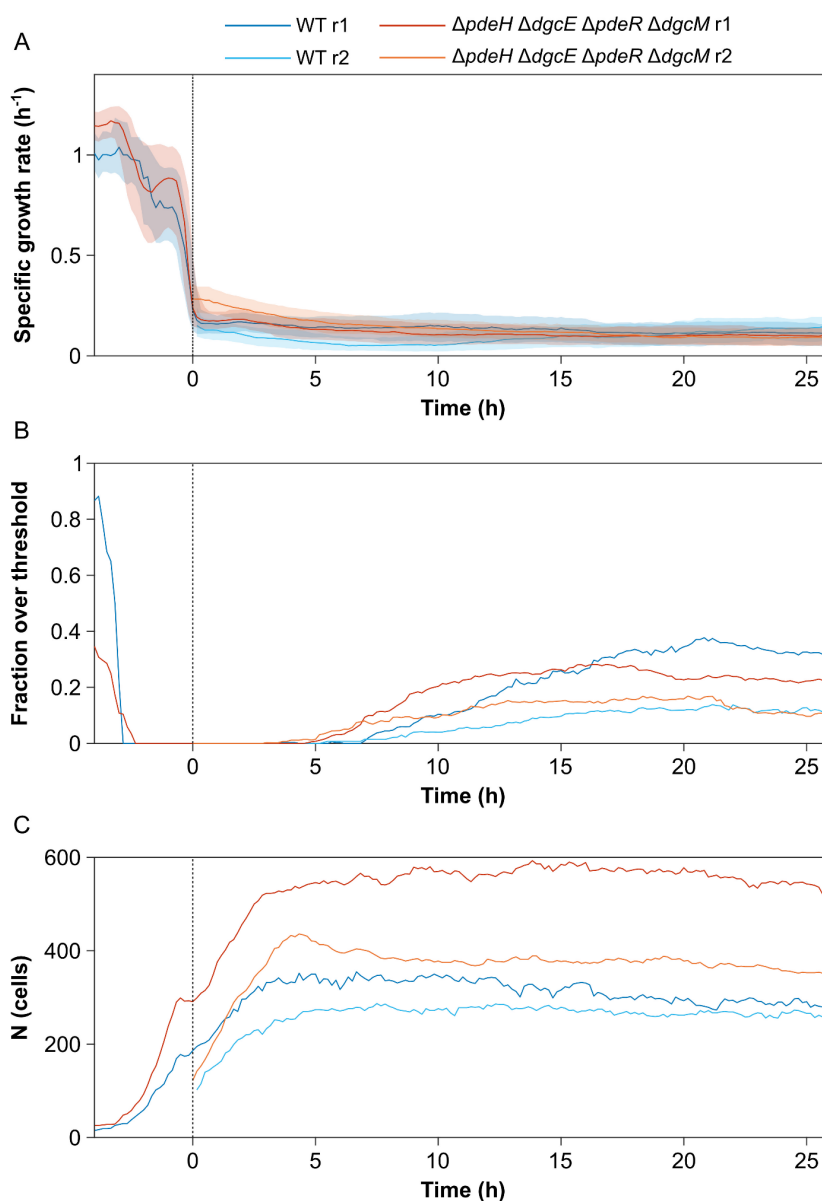

633  
634 **Figure S9: Growth rates and fraction of curli expressing cells over time.** Stationary phase cells  
635 were introduced into mother machine devices, supplied with fresh medium and then switched to  
636 conditioned medium after four hours of growth, as in Figure 4. **(A)** Median instantaneous growth rates  
637 for the wildtype and for the  $\Delta pdeH \Delta dgcE \Delta pdeR \Delta dgcM$  strain disabled in the c-di-GMP regulation.  
638 Growth rate drops rapidly and cells switch on curli expression after a switch to conditioned medium.  
639 Shaded area is interquartile range. **(B)** Fraction of cells with fluorescence exceeding 1000 units. **(C)**  
640 Number of detected cells. Two biological replicates (r1 and r2) were performed for each strain; data for  
641 the r1 replicate are also shown in Figure 4. Note that in the experiment r2 cells were only imaged after  
642 medium switching.

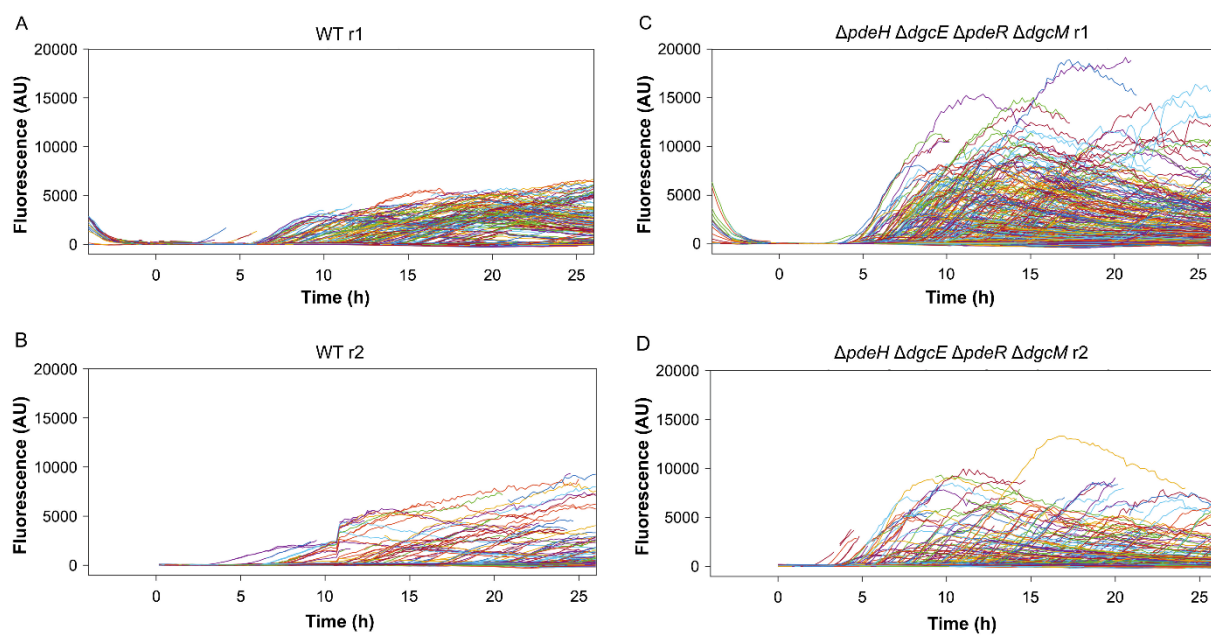

643  
644 **Figure S10: Single-cell traces of cell fluorescence for all cells for the wildtype and for the c-di-**  
645 **GMP-regulation disabled strain.** Data are from the same biological replicates (r1 and r2) as in Figure  
646 S9.

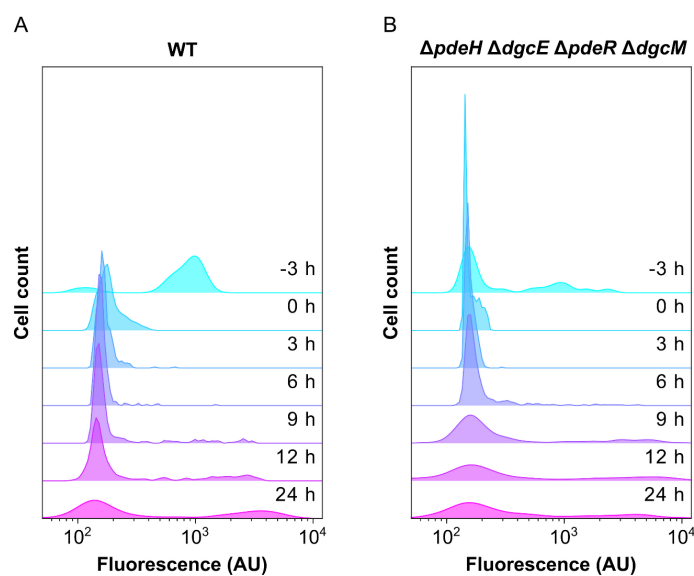

647

648 **Figure S11: Distributions of curli expression at different time points in the microfluidics**  
649 **experiment.** Shown are kernel density estimates of curli expression in the wildtype WT (A) and in the  
650 c-di-GMP-regulation disabled strain (B) at selected time points, for the replicate presented in Figure 4.  
651 In time order, for WT, n = 18, 158, 332, 317, 335, 342 and 285, and for the  $\Delta pdeH \Delta dgcE \Delta pdeR \Delta dgcM$   
652 strain, n = 25, 247, 525, 546, 581, 546 and 544.

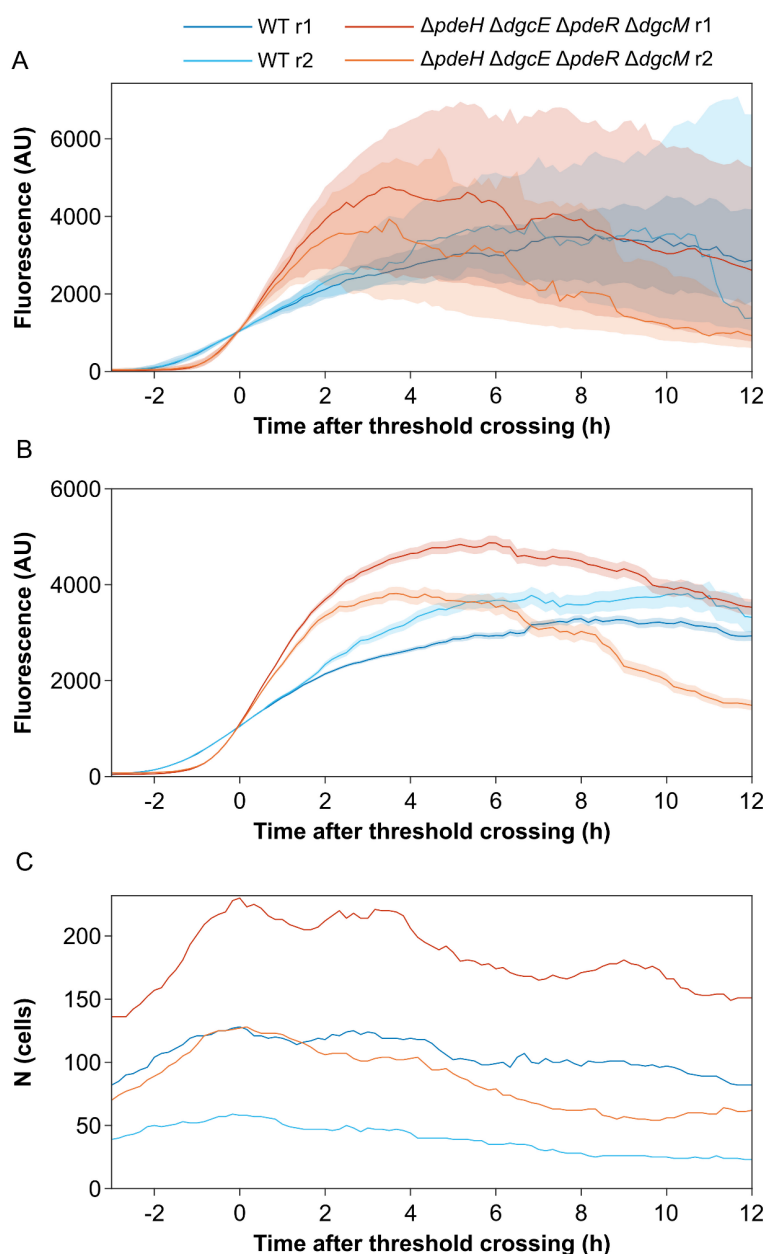

653

654 **Figure S12: The rate and variability of curli induction for the wildtype and for the c-di-GMP-**  
655 **regulation disabled strain. (A) Median curli expression, (B) mean curli expression, (C) number of cells**  
656 **for traces from both microfluidics experiments (r1 and r2) aligned by the time at which they exceeded a**  
657 **threshold of  $10^3$  fluorescence units. Shaded area is interquartile range in (A) or standard error in (B).**  
658 **Compared to the WT, the rate of curli induction is faster but traces show more variability in a mutant**  
659 **without the global or local c-di-GMP regulatory modules.**

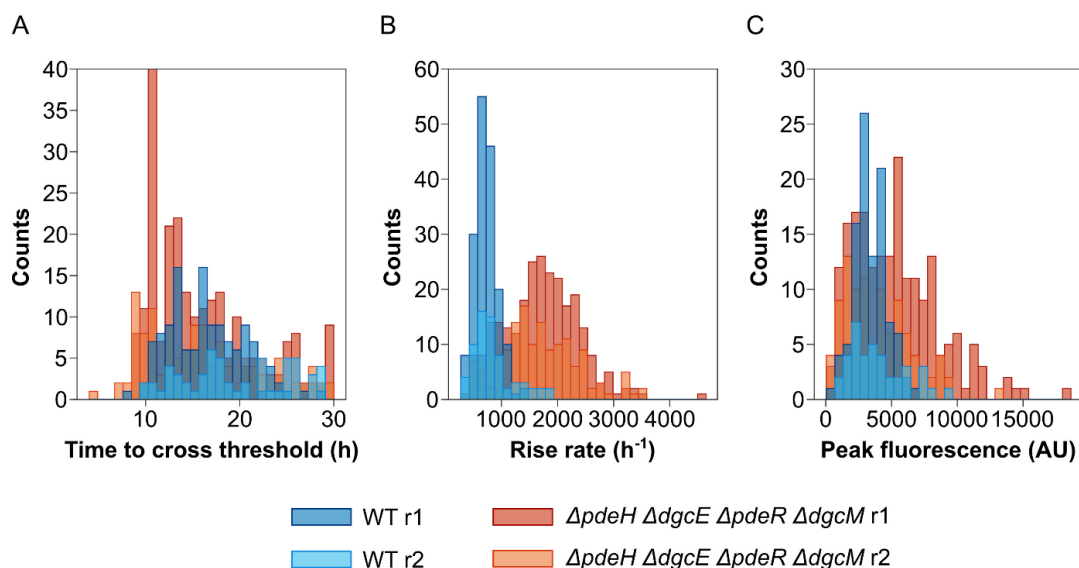

660  
661

662 **Figure S13: Distributions of curli induction parameters for the wildtype and for the c-di-GMP-**  
663 **regulation disabled strain.** Shown are histograms of the times at which a threshold of  $10^3$  fluorescence  
664 units were crossed (A), the maximum rates of increase in fluorescence (B), or the fluorescence  
665 amplitudes at the first peak (C) for cell traces from both microfluidics experiments. Though switch timing  
666 is similar, rates of curli induction are faster and peak amplitudes more variable in a mutant without the  
667 global or local c-di-GMP regulatory modules.

668 **Table S1. *E. coli* strains and plasmids used in this study.**

| Strains  | Relevant genotype                                                                                                                            | Reference |
|----------|----------------------------------------------------------------------------------------------------------------------------------------------|-----------|
| W3110    | W3110 derivative with functional RpoS                                                                                                        | [1]       |
| VS1146   | W3110 <i>csgA::csgA_RBS_sfgfp</i>                                                                                                            | [2]       |
| VS1857   | VS1146 $\Delta mlrA$                                                                                                                         | This work |
| VS1732   | VS1146 $\Delta pdeH$                                                                                                                         | This work |
| VS1720   | VS1146 $\Delta dgcE$                                                                                                                         | This work |
| VS1258   | VS1146 $\Delta pdeR$                                                                                                                         | This work |
| VS1257   | VS1146 $\Delta dgcM$                                                                                                                         | This work |
| VS1717   | VS1146 $\Delta pdeH \Delta dgcE$                                                                                                             | This work |
| VS1713   | VS1146 $\Delta pdeR \Delta dgcM$                                                                                                             | This work |
| VS1729   | VS1146 $\Delta pdeH \Delta dgcE \Delta pdeR \Delta dgcM$                                                                                     | This work |
| Plasmids |                                                                                                                                              |           |
| pTrc99a  | Expression vector; <i>P<sub>trc</sub></i> promoter inducible by isopropyl- $\beta$ -D-thiogalactopyranoside (IPTG); pBR ori; Ap <sup>R</sup> | [3]       |
| pVS2689  | pTrc99a:: <i>pdeH</i>                                                                                                                        | This work |
| pVS1644  | pTrc99a:: <i>dgcE</i>                                                                                                                        | This work |

669

670 1. Serra DO, Richter AM, Klauck G, Mika F, Hengge R. Microanatomy at cellular resolution and  
671 spatial order of physiological differentiation in a bacterial biofilm. *mBio*. 2013;4(2):e00103-13. Epub  
672 2013/03/21. doi: 10.1128/mBio.00103-13. PubMed PMID: 23512962; PubMed Central PMCID:  
673 PMC3604763.

674 2. Besharova O, Suchanek VM, Hartmann R, Drescher K, Sourjik V. Diversification of gene  
675 expression during formation of static submerged biofilms by *Escherichia coli*. *Frontiers in Microbiology*.  
676 2016. doi: 10.3389/fmicb.2016.01568.

677 3. Amann E, Ochs B, Abel K-J. Tightly regulated tac promoter vectors useful for the expression of  
678 unfused and fused proteins in *Escherichia coli*. *Gene*. 1988;69(2):301-15. doi:  
679 [https://doi.org/10.1016/0378-1119\(88\)90440-4](https://doi.org/10.1016/0378-1119(88)90440-4).

680

681



## 682 **Supporting protocols**

683

684 **Design and fabrication of the mother machine.** A microfluidic device was used for time-  
685 resolved studies of *E. coli* growth and curli expression, which features mother machines traps  
686 for the observation of one-dimensional cell growth. The design of the microfluidic device is  
687 shown in Figure S8. The channel structure of the microfluidic device features four independent  
688 channels with a depth of 8  $\mu\text{m}$ , allowing the realization of four conditions, e.g. different media  
689 compositions, in one experiment. Each channel contains two inlets enabling on-chip switching  
690 between two different media, which are supplied at defined pressures. By controlling the  
691 pressure ratio between the two inlets, the medium supplied at the higher pressure flows  
692 through the central channel following the junction, while the other medium is pushed away  
693 from the junction and flows out through the waste channel (Figure S8D). The medium which  
694 flows through the central channel reaches the mother machine cultivation sites before exiting  
695 the chip through a single outlet.

696 The device was produced using a two-layer soft lithography method as described previously[1].  
697 Based on our in-house made design of the channel layout, a 100 mm silicon wafer was  
698 produced by e-beam lithography (ConScience, Sweden). The wafer contains the channel  
699 layout as a positive relief. The mother machine traps, which are shown in blue in Figure S8A-  
700 C, were structured by etching the wafer by 0.8  $\mu\text{m}$ , giving the mother machine the appropriate  
701 vertical dimension for cell trapping. The supply channels, which are shown in green in Figure  
702 S8A-C, are implemented as photoresist structures with a height of 8  $\mu\text{m}$  on the wafer. The  
703 wafer served as a master mold for liquid polydimethylsiloxane (Sylgard 184 PDMS, VwR  
704 International GmbH, Germany), which was mixed at volumetric ratio of 7:1 with a cross-linking  
705 agent, degassed in a desiccator for 30 minutes and poured over the wafer to a height of  
706 approximately 4 mm and thermally cured at 80 °C overnight. The cured PDMS was peeled off  
707 from the wafer and manually cut into separate chips. Inlet and outlet holes were punched with  
708 a 0.75 mm punching tool (Robbins True-Cut Disposable Biopsy Punch 0.75mm with Plunger,  
709 Robbins Instruments, USA). The surface of the chip was cleaned by a rinse with isopropanol  
710 and the application of adhesive tape (tesafilm, Germany) prior to bonding. The chip was  
711 irreversibly bonded to a glass substrate by applying oxygen plasma to both chip and glass  
712 surfaces (Diener Femto, Diener GmbH, Germany) and bringing the treated surfaces together.  
713 The bond was strengthened by storing the bonded device in the oven at 80 °C for two minutes.  
714 The device was mounted on an inverted fluorescence microscope (Nikon Eclipse Ti, Nikon  
715 Corporation, Japan) equipped with an incubator. The microscope setup included an Andor Zyla  
716 4.2 sCMOS camera (Oxford Instruments, UK), an objective with 100x magnification (Plan  
717 Apochromat  $\lambda$  Oil, NA=1.45, WD=170  $\mu\text{m}$ ; Nikon, Japan) and a perfect focus system (Nikon  
718 Corporation, Japan) for focus drift compensation

719

720 **Growth experiments.** *E. coli* cells were allowed to grow in TB medium until the stationary  
721 phase prior to inoculation into the device. Conditioned medium was prepared by cultivating the  
722 wildtype *E. coli* cells in TB medium for 20 hours, after which the cell suspension was  
723 centrifuged at 4000 rpm for ten minutes, the medium was filter sterilized and stored at 4°C.  
724 The mother machine growth sites were loaded with the undiluted cell suspension by manual  
725 infusion of the cell suspension through one of the two inlets using a 1-ml syringe. The  
726 connection between the syringe and the chip was realized by tygon tubing (Tygon S-54-HL,  
727 inner diameter = 0.51 mm, outer diameter = 1.52 mm, VwR International GmbH, Germany) in  
728 combination with blunt dispensing needles (General purpose tips, inner diameter = 0.41 mm,  
729 outer diameter = 0.72 mm, Nordson EFD, USA). Medium flow was controlled by programmable  
730 pressure regulators (LineUP FlowEZ, FLUIGENT, France), which generated flow by applying  
731 pressure on 50-ml medium reservoirs (P-CAP series, FLUIGENT, France). Fresh and  
732 conditioned TB medium were respectively filled in separate reservoirs, and each one was  
733 pressurized by one module of the pressure regulator. After the cell inoculation both media were  
734 connected to the inlets of the channel via tygon tubing and blunt dispensing needles. The  
735 pressure at the inlet of the fresh TB medium was set to 200 mbar and remained constant  
736 throughout the experiment. During the selection of the positions for imaging the pressure at  
737 the inlet of the conditioned medium was set to 250 mbar, allowing the conditioned medium to  
738 flow through the junction to the mother machine growth sites and thereby maintaining the  
739 stationary state of the cells. At the beginning of imaging, the pressure at the inlet of the  
740 conditioned medium was reduced to 150 mbar and programmed to increase back to 250 mbar  
741 after 4 hours of on-chip cultivation, thereby activating a medium switch from fresh to  
742 conditioned TB medium. Phase contrast and GFP fluorescence images were acquired with a  
743 time interval of 10 min.

744

745 **Analysis of microfluidics data.** Cells were segmented from phase contrast images by  
746 making use of a fully convolutional neural network based on the U-net architecture [2]. A set  
747 of manually curated cell outlines was prepared for training (1105 outlines) and validation (346  
748 outlines) of the network. The training set was augmented by scaling, rotation, flipping and  
749 addition of white noise. A U-net of depth three, with 8, 16 and 32 filters along the contracting  
750 path, was trained to predict cell interiors from phase contrast images. Phase contrast images  
751 were normalized by subtracting the median and scaling to intensities expected between the  
752 2<sup>nd</sup> and 98<sup>th</sup> percentiles. Cell interiors were defined from the curated outlines by filling each  
753 outline and then subjecting it to two rounds of morphological erosion. The erosion step ensured  
754 that neighbouring cells predicted by the network were well separated, such that distinct cell  
755 instances could be clearly identified simply by thresholding the prediction and labelling

756 connected regions. After instance identification, two rounds of morphological dilation restored  
757 each mask to its original size. Finally, a smooth outline for each cell was obtained as a two-  
758 dimensional spline defined by equidistant knots placed on the mask edge.

759 To track cells between time points, we applied a length conservation strategy for the cells along  
760 each trench. At each time point, we ordered cell outlines by their depth in the trench, with  
761 deepest cells first. We then attempted to match, in order, a cell outline in time point  $t$  with one  
762 or more cell outlines in time point  $t+1$ , chosen such that the sum of their cell lengths would be  
763 conserved within some threshold tolerance. In the trivial case, the length of the first outline at  
764 time point  $t$  would match that of the first outline at time point  $t+1$ . In the event of cell division,  
765 the cell length at time point  $t$  would match the sum of the first two cell lengths at time point  $t+1$ .  
766 Since cells may grow in length between time points, we also initialised a growth rate parameter  
767 for each cell that biased the expected cell lengths for time point  $t+1$  as a fold-increase in length.  
768 To enable adaptation to the true growth rate, the growth rate parameter was updated by a  
769 lagging average over 20 time points. To increase robustness to errors in segmentation, we  
770 additionally allowed state transitions from one to many and many to one, and built a proposal  
771 tree, which branched for all valid assignments lying within the length thresholds. We searched  
772 for the proposal with the lowest average fold-change in matched lengths, but limited branching  
773 by retaining only the 10 best proposals for subsequent nodes (cell outlines) in the tree. The  
774 length thresholds were deliberately set loosely such that the (sum of) cell length(s) at  $t+1$  could  
775 decrease at most five-fold or increase at most two-fold relative to the (sum of) cell length(s) at  
776  $t$ . This increased the number of valid proposals, but was important in cases where the growth  
777 rate estimate was poor. For transitions where one cell outline split into more than two, or  
778 transitions where multiple outlines merged into one cell, a new label was generated for the  
779 corresponding cells at  $t+1$ . We made one exception to this labelling strategy to account for  
780 occasional ambiguity in segmentation near division events, where a cell segmented as two  
781 sister cells could later be segmented as a single mother cell. Specifically, when two sister cells  
782 — i.e., cells that were previously involved in a division event — merged into one, the label was  
783 set back to that of the mother; at the next division event, the labels of the sister cells were also  
784 retained. Finally, note that any outlines below a minimum size threshold of 50 pixels were  
785 ignored. All errors in tracking were manually curated.

786 Cell length was estimated from cell regions as the 'major axis length' of the Matlab regionprops  
787 function — the major axis of the ellipse with same normalised second central moment as the  
788 region. Instantaneous growth rates were estimated from the derivative of a smoothing spline  
789 fitted to the logarithm of cell length over each cell division cycle. Knots for the spline were  
790 placed at intervals of at least 15 time points. Single-cell fluorescence traces were quantified  
791 from the median fluorescence within each outline. Background fluorescence varied as a  
792 function of time due to the accumulation of cells at some trench exits, so we corrected for

793 background fluorescence in each trench at each time point using the median value of all non-  
794 cell pixels. Fluorescence traces were characterised along branching lineages and were  
795 smoothed with a Savitzky-Golay filter of order 3 and window length 21. The derivative of the  
796 filter was used to obtain the maximum rate of fluorescence increase. In cases where multiple  
797 descendants shared a common peak event before branching, we counted that event only once.

798

## 799 **References**

- 800 1. Qin D, Xia Y, Whitesides GM. Soft lithography for micro- and nanoscale patterning. Nat  
801 Protoc. 2010;5(3):491-502. Epub 2010/03/06. doi: 10.1038/nprot.2009.234. PubMed PMID:  
802 20203666.
- 803 2. Ronneberger O, Fischer P, Brox T. U-net: Convolutional networks for biomedical image  
804 segmentation. arXiv. 2015;[1505.04597].  
805
